# Supplementary material for: Persistent influence of the North Atlantic Oscillation on Late Holocene hydroclimate in southwestern Greenland
Source: Research Square preprint supplement (doi:10.21203/rs.3.rs-7656605/v1), 2025-10-16
Supplement: Supplementary file 2 [file 427cdc23d34651d7c0b99f06.xlsx]

## Sheet: Table S1  Radiocarbon Dates
Table S1: Radiocarbon dates and calibrated ages of GeoB25206-2 (in bold) and those from Ga3-2 at the depth scale of the GeoB25206 (original depth is shown in brackets).
Depth (cm)	Lab ID	Radiocarbon age (yr BP)	Error (yr)	Cal. age range (2σ) age range (cal. Yr BP)	Modelled median age (cal. yr BP)
22.5	JF43	691	66	16-410	220
33.4 (14)	KIA33122	795	25	152.5-501.5	352
78.3 (56)	KIA31753	1455	40	700-1067	882
164.9 (134)	KIA33123	2535	40	1880-2297	2100
241.6 (204)	KIA33124	3295	30	2852-3231	3043
298.6 (256)	KIA31752	3895	45	3522-3961	3751
349.5	JF38	4154	71	3889-4388	4134
406.1 (354)	KIA33125	4655	30	4688-5276	4907
497.3 (454)	KIA33126	6030	40	6263-6721	6455
501	JF22	6361	83	6446-6945	6698
587.3(556)	KIA31751	7560	70	7579-8080	7854
646.5	JF39	8227	89	8394-8947	8649
746	JF23	9136	99	9511-10121	9791
901	JF24	9678	101	10195-10865	10515
1011	JF25	10091	126	10672-11498	11095

## Sheet: Table S2 CT Data 
Table S2: Results of the CT scanning analysis shown in Fig. 3 and S3
Depth (cm)	Year (BP)		Bioturbation (vol.%)	Mean x-ray attenuation of matrix sediment (HU)	IRD (clasts/cm3)
0.24216	85		0	863.426	22.7909
0.27243	85		0	864.473	24.9423
0.3027	85		0	861.883	25.258
0.33297	86		0	856.853	25.4477
0.36324	86		0	851.039	26.5585
0.393509	86		0.0228277	845.97	26.4226
0.423779	86		0.031759	842.847	26.2596
0.454049	87		0.0113393	841.895	26.3018
0.484319	87		0.0106705	844.789	26.4815
0.514589	87		0.00630072	846.984	25.0311
0.544859	87		0.0239094	845.401	24.7167
0.575129	88		0.00570926	841.797	24.8961
0.605399	88		0.00218739	839.101	22.6548
0.635669	88		0.0147665	837.225	22.3006
0.665939	88		0.0193453	834.973	22.4345
0.696209	89		0.0128472	834.617	22.43
0.726479	89		0.201229	836.584	23.1103
0.756749	89		0.389476	838.645	25.4054
0.787019	89		0.523446	839.58	25.7077
0.817289	90		0.623035	840.791	26.0407
0.847559	90		0.693993	842.101	26.3295
0.877829	90		0.725455	842.977	26.333
0.908099	90		0.727893	843.693	26.9533
0.938369	90		0.658406	844.636	27.7396
0.968639	91		0.558293	845.348	27.8701
0.998909	91		0.465286	846.33	30.0785
1.02918	91		0.397518	847.715	29.7678
1.05945	91		0.351532	848.903	27.3957
1.08972	92		0.322256	849.795	27.6504
1.11999	92		0.31193	850.4	26.8627
1.15026	92		0.309837	850.225	27.1148
1.18053	92		0.294851	849.167	27.9144
1.2108	93		0.298288	847.624	28.682
1.24107	93		0.284057	845.474	29.4288
1.27134	93		0.289414	844.974	29.0346
1.30161	93		0.248341	845.882	29.78
1.33188	94		0.214859	847.024	28.7724
1.36215	94		0.187806	847.202	29.459
1.39242	94		0.199675	846.675	31.3175
1.42269	94		0.199571	845.491	29.1673
1.45296	95		0.190063	845.675	29.8372
1.48323	95		0.178708	847.456	30.5436
1.5135	95		0.16661	848.513	30.1198
1.54377	95		0.183955	848.806	31.416
1.57404	96		0.215062	849.303	31.5602
1.60431	96		0.26346	849.249	32.3104
1.63458	96		0.313715	848.726	34.2813
1.66485	96		0.328091	848.178	35.0934
1.69512	97		0.36895	847.899	34.1381
1.72539	97		0.378739	847.741	35.5348
1.75566	97		0.41138	848.106	38.1701
1.78593	97		0.441961	848.057	38.4399
1.8162	98		0.466169	848.029	38.6677
1.84647	98		0.487609	848.92	36.461
1.87674	98		0.488071	850.169	37.9093
1.90701	98		0.483184	850.879	36.8658
1.93728	98		0.437563	851.708	37.7267
1.96755	99		0.40283	852.823	38.0117
1.99782	99		0.369993	854.073	38.2538
2.02809	99		0.34905	854.775	36.533
2.05836	99		0.374998	855.536	35.4066
2.08863	100		0.419067	856.808	34.8686
2.1189	100		0.479897	857.436	35.051
2.14917	100		0.495314	858.366	35.2383
2.17944	100		0.548892	859.683	34.8333
2.20971	101		0.564331	860.326	32.9727
2.23998	101		0.548907	860.812	33.8758
2.27025	101		0.510894	861.344	33.5423
2.30052	101		0.452961	861.929	33.3129
2.33079	102		0.312282	862.298	33.341
2.36106	102		0.228829	862.594	31.4593
2.39133	102		0.199742	862.815	30.0554
2.4216	102		0.135261	862.629	30.0321
2.45187	103		0.0835346	862.178	29.2702
2.48214	103		0.0654206	862.744	26.7063
2.51241	103		0.0790263	864.347	24.8536
2.54268	103		0.134426	864.981	22.5088
2.57295	104		0.177054	865.057	22.2814
2.60322	104		0.206178	865.994
2.63349	104		0.229875	866.732
2.66376	104		0.205279	866.39
2.69403	104		0.177971	864.854
2.7243	105		0.14174	862.571
2.75457	105		0.144666	860.534
2.78484	105		0.153955	858.625
2.81511	106		0.176024	857.456
2.84538	106		0.205515	856.034
2.87565	106		0.181938	854.461
2.90592	106		0.125314	853.244
2.93619	106		0.0704773	852.645
2.96646	107		0.00274803	851.999
2.99673	107		0	851.411
3.027	107		0.00183315	851.54
3.05727	107		0.0110046	851.162
3.08754	108		0.00826181	850.323
3.11781	108		0.00734619	849.37
3.14808	108		0	848.993
3.17835	108		0.00183903	849.306
3.20862	109		0.00919549	850.157
3.23889	109		0.0110259	850.692
3.26916	109		0.00734228	850.521
3.29943	109		0.000917818	850.232
3.3297	110		0	850.06
3.35997	110		0	849.883
3.39024	110		0	849.684
3.42051	110		0	850.196
3.45078	111		0	851.094
3.48105	111		0	851.414
3.51132	111		0	851.011
3.54159	111		0	849.709
3.57186	112		0	848.651
3.60213	112		0	848.148
3.6324	112		0	847.915
3.66267	112		0	847.662
3.69294	112		0	848.131
3.72321	113		0	848.709
3.75348	113		0	848.279
3.78374	113		0	847.237
3.81401	113		0	846.968
3.84428	114		0	847.065
3.87455	114		0.00549516	846.017
3.90482	114		0.0146538	844.457
3.93509	114		0.021979	842.789
3.96536	115		0.0201508	841.633
3.99563	115		0.0229022	840.572
4.0259	115		0.0256558	839.908
4.05617	115		0.0247436	840.633
4.08644	116		0.0137486	841.791
4.11671	116		0	842.274
4.14698	116		0	841.942
4.17725	116		0	841.986
4.20752	117		0	842.514
4.23779	117		0.00275088	842.115
4.26806	117		0.00642072	841.436
4.29833	117		0.0100988	840.555
4.3286	118		0.0091851	838.986
4.35887	118		0.00826613	838.114
4.38914	118		0.00091878	838.179
4.41941	118		0	838.77
4.44968	119		0	838.939
4.47995	119		0	838.711
4.51022	119		0	838.88
4.54049	119		0	839.676
4.57076	120		0	840.51
4.60103	120		0	840.187
4.6313	120		0	838.596
4.66157	120		0	836.659
4.69184	120		0	835.305
4.72211	121		0	834.99
4.75238	121		0	835.175
4.78265	121		0	834.7
4.81292	121		0	833.484
4.84319	122		0	832.825
4.87346	122		0	833.125
4.90373	122		0	833.915
4.934	122		0	834.557
4.96427	123		0	834.571
4.99454	123		0	835.231
5.02481	123		0	835.923
5.05508	123		0	836.219
5.08535	124		0	836.815
5.11562	124		0	836.915
5.14589	124		0	836.27
5.17616	124		0	835.659
5.20643	125		0.00460337	835.426
5.2367	125		0.00552471	834.936
5.26697	125		0.00552532	834.038
5.29724	125		0	833.82
5.32751	126		0	834.368
5.35778	126		0	835.616
5.38805	126		0	837.068
5.41832	126		0	838.606
5.44859	127		0	840.035
5.47886	127		0	841.061
5.50913	127		0	841.231
5.5394	127		0	841.632
5.56967	128		0	843.128
5.59994	128		0	845.011
5.63021	128		0	846.549
5.66048	128		0	847.78
5.69075	128		0	848.019
5.72102	129		0	848.03
5.75129	129		0	848.594
5.78156	129		0	849.162
5.81183	129		0	849.624
5.8421	130		0	850.184
5.87237	130		0	850.774
5.90264	130		0	850.919
5.93291	130		0	850.411
5.96318	131		0	850.262
5.99345	131		0	850.452
6.02372	131		0	850.954
6.05399	131		0	851.282
6.08426	132		0	850.504
6.11453	132		0	849.702
6.1448	132		0	848.982
6.17507	132		0	848.235
6.20534	133		0	847.999
6.23561	133		0.00185022	848.884
6.26588	133		0.0101629	849.94
6.29615	133		0.00739085	850.734
6.32642	134		0.00739003	851.614
6.35669	134		0.00831409	852.686
6.38696	134		0.00831294	853.535
6.41723	134		0.00831324	854.148
6.4475	135		0.0184746	854.337
6.47777	135		0.0120074	854.177
6.50804	135		0.00646615	854.561
6.53831	135		0.00277019	855.447
6.56858	136		0	856.609
6.59885	136		0	857.393
6.62912	136		0	857.56
6.65939	136		0	857.256
6.68966	137		0	857.616
6.71993	137		0	858.211
6.7502	137		0	858.972
6.78047	137		0	859.086
6.81074	137		0	858.881
6.84101	138		0	858.945
6.87128	138		0	859.582
6.90155	138		0	860.729
6.93182	138		0	861.64
6.96209	139		0	862.67
6.99236	139		0	863.458
7.02263	139		0	863.956
7.0529	139		0	863.914
7.08317	140		0	864.273
7.11344	140		0	865.095
7.14371	140		0	866.627
7.17398	140		0	867.991
7.20425	141		0	869.64
7.23452	141		0	870.575
7.26479	141		0	869.845
7.29506	141		0	867.987
7.32533	142		0	867.031
7.3556	142		0	868.149
7.38587	142		0	870.432
7.41614	142		0	873.311
7.44641	143		0	876.027
7.47668	143		0	877.566
7.50695	143		0	879.36
7.53722	143		0	881.279
7.56749	144		0	882.78
7.59776	144		0	883.184
7.62803	144		0	882.537
7.6583	144		0	882.255
7.68857	145		0	881.928
7.71884	145		0	881.979
7.74911	145		0	882.695
7.77938	145		0	883.011
7.80965	145		0	882.454
7.83992	146		0	881.361
7.87019	146		0.00463491	881.174
7.90046	146		0.00834624	881.338
7.93073	146		0.00278151	882.584
7.961	147		0	883.673
7.99127	147		0.0074237	884.447
8.02154	147		0.0194742	885.051
8.05181	147		0.0296417	885.76
8.08208	148		0.0416809	885.478
8.11235	148		0.0426092	884.213
8.14262	148		0.0379777	883.111
8.17289	148		0.0444671	882.989
8.20316	149		0.0537336	882.652
8.23343	149		0.0704271	882.811
8.2637	149		0.0481829	883.498
8.29397	149		0.0481736	883.808
8.32424	150		0.0426226	883.948
8.35451	150		0.0176074	884.717
8.38478	150		0.00463122	884.714
8.41505	150		0.0074118	883.659
8.44532	151		0	882.744
8.47559	151		0	882.409
8.50586	151		0	882.14
8.53613	151		0	882.448
8.5664	152		0	883.242
8.59667	152		0	882.951
8.62694	152		0	883.1
8.65721	152		0	884.293
8.68748	153		0	884.394
8.71775	153		0	885.253
8.74802	153		0	886.913
8.77829	153		0	889.002
8.80856	153		0	890.535
8.83883	154		0	892.087
8.8691	154		0	894.176
8.89937	154		0	896.297
8.92964	154		0	898.502
8.95991	155		0	899.9
8.99018	155		0	900.388
9.02045	155		0	900.623
9.05072	155		0	900.542
9.08099	156		0	900.483
9.11126	156		0	901.312
9.14153	156		0	902.093
9.1718	156		0	902.067
9.20207	157		0	901.538
9.23234	157		0	901.654
9.26261	157		0	903.461
9.29288	157		0	905.829
9.32315	158		0	908.091
9.35342	158		0	908.312
9.38369	158		0	905.118
9.41396	158		0	900.202
9.44423	159		0	898.335
9.4745	159		0	900.755
9.50477	159		0	904.113
9.53504	159		0	905.304
9.56531	160		0	904.937
9.59558	160		0	903.975
9.62585	160		0	902.572
9.65612	160		0.0262726	901.144
9.68639	161		0.0599959	900.566
9.71666	161		0.108564	899.997
9.74693	161		0.146983	899.936
9.7772	161		0.147998	901.25
9.80747	161		0.131701	902.156
9.83774	162		0.124823	902.391
9.86801	162		0.150945	902.862
9.89828	162		0.157529	903.35
9.92855	162		0.143571	903.208
9.95882	163		0.113753	902.467
9.98909	163		0.0727517	902.083
10.0194	163		0.0345285	901.334
10.0496	163		0.00653192	900.627
10.0799	164		0	900.883
10.1102	164		0	901.047
10.1404	164		0	901.268
10.1707	164		0	902.422
10.201	165		0	903.794
10.2312	165		0	904.332
10.2615	165		0	903.34
10.2918	165		0	901.941
10.3221	166		0	900.297
10.3523	166		0	899.186
10.3826	166		0	898.737
10.4129	166		0	897.778
10.4431	166		0	896.14
10.4734	167		0	894.357
10.5037	167		0	893.113
10.5339	167		0	893.407
10.5642	167		0	894.434
10.5945	168		0	895.062
10.6248	168		0	895.09
10.655	168		0	893.986
10.6853	168		0	892.569
10.7156	169		0	891.262
10.7458	169		0	890.164
10.7761	169		0	888.422
10.8064	169		0	886.04
10.8366	170		0	883.712
10.8669	170		0	882.319
10.8972	170		0	882.057
10.9275	170		0	882.51
10.9577	171		0	882.325
10.988	171		0	880.881
11.0183	171		0	879.643
11.0485	171		0	878.636
11.0788	172		0	877.856
11.1091	172		0	876.887
11.1393	172		0	876.337
11.1696	172		0	876.111
11.1999	172		0	875.802
11.2302	173		0	875.09
11.2604	173		0	873.429
11.2907	173		0	871.419
11.321	173		0	870.514
11.3512	174		0	870.119
11.3815	174		0	869.247
11.4118	174		0	869.049
11.442	174		0	868.56
11.4723	175		0	866.54
11.5026	175		0	864.118
11.5329	175		0	861.937
11.5631	175		0	861.191
11.5934	176		0.00468568	861.762
11.6237	176		0.00374992	862.565
11.6539	176		0	862.736
11.6842	176		0	862.433
11.7145	177		0	862.072
11.7447	177		0	861.878
11.775	177		0	861.508
11.8053	177		0	861.192
11.8356	178		0	860.57
11.8658	178		0	860.506
11.8961	178		0.00281706	861.216
11.9264	178		0.00281719	862.671
11.9566	179		0.00281799	863.489
11.9869	179		0	863.145
12.0172	179		0	862.451
12.0474	179		0	861.81
12.0777	179		0.00469806	861.943
12.108	180		0.00282034	863.215
12.1383	180		0	865.488
12.1685	180		0.00658223	867.333
12.1988	180		0.00470053	867.797
12.2291	181		0	866.9
12.2593	181		0	865.712
12.2896	181		0	864.303
12.3199	181		0	863.003
12.3501	182		0	862.463
12.3804	182		0	863.253
12.4107	182		0	864.556
12.441	182		0	865.539
12.4712	183		0	865.546
12.5015	183		0	865.773
12.5318	183		0	867.019
12.562	183		0	869.056
12.5923	183		0	869.918
12.6226	184		0	869.192
12.6528	184		0	868.375
12.6831	184		0	867.868
12.7134	184		0	867.121
12.7437	185		0	866.106
12.7739	185		0	864.816
12.8042	185		0.00282715	863.567
12.8345	185		0.00471116	862.658
12.8647	186		0.0103668	861.962
12.895	186		0.010368	861.393
12.9253	186		0.0094248	860.949
12.9555	186		0.012251	861.37
12.9858	187		0.00942889	863.087
13.0161	187		0.00943058	865.26
13.0464	187		0.0103731	867.199
13.0766	187		0.00566006	869.256
13.1069	188		0	871.115
13.1372	188		0	871.434
13.1674	188		0	870.618
13.1977	188		0	870.138
13.228	189		0	870.092
13.2582	189		0	871.049
13.2885	189		0	872.338
13.3188	189		0	872.756
13.3491	190		0	872.615
13.3793	190		0	872.718
13.4096	190		0	874.313
13.4399	190		0	877.828
13.4701	190		0	881.72
13.5004	191		0	883.618
13.5307	191		0	884.185
13.5609	191		0	883.61
13.5912	191		0	882.765
13.6215	192		0	882.348
13.6518	192		0	883.009
13.682	192		0	883.647
13.7123	192		0	883.175
13.7426	193		0	882.475
13.7728	193		0	882.799
13.8031	193		0	883.183
13.8334	193		0	881.75
13.8636	194		0	880.407
13.8939	194		0	879.945
13.9242	194		0	879.703
13.9545	194		0	880.015
13.9847	194		0	880.944
14.015	195		0	882.098
14.0453	195		0	883.091
14.0755	195		0	883.828
14.1058	196		0	883.616
14.1361	196		0	883.666
14.1663	196		0	884.853
14.1966	196		0	885.537
14.2269	196		0	885.21
14.2572	197		0	885.315
14.2874	197		0	886.21
14.3177	197		0	887.965
14.348	197		0	888.488
14.3782	198		0.00758639	888.729
14.4085	198		0.0094838	888.61
14.4388	198		0.00948353	888.882
14.469	198		0.0142253	890.131
14.4993	199		0.014226	890.949
14.5296	199		0.0113848	891.407
14.5599	199		0.005694	891.86
14.5901	199		0	891.814
14.6204	200		0	891.177
14.6507	200		0	891.145
14.6809	200		0	891.048
14.7112	200		0	890.593
14.7415	201		0	890.845
14.7717	201		0	893.058
14.802	201		0	894.969
14.8323	201		0	896.675
14.8626	201		0	897.097
14.8928	202		0	896.599
14.9231	202		0	897.548
14.9534	202		0	900.026
14.9836	202		0.0056986	901.651
15.0139	203		0.00285	902.575
15.0442	203		0	903.059
15.0744	203		0	903.089
15.1047	203		0	903.947
15.135	204		0	905.185
15.1652	204		0	906.115
15.1955	204		0	906.732
15.2258	204		0	906.863
15.2561	205		0.00475272	906.199
15.2863	205		0.0038012	906.075
15.3166	205		0	907.091
15.3469	205		0	909.049
15.3771	206		0	910.987
15.4074	206		0	912.439
15.4377	206		0	912.814
15.4679	206		0	913.193
15.4982	207		0	912.886
15.5285	207		0	912.084
15.5588	207		0	910.689
15.589	207		0	909.695
15.6193	207		0	910.12
15.6496	208		0	910.643
15.6798	208		0.00855448	911.104
15.7101	208		0	911.935
15.7404	208		0	912.497
15.7706	209		0	912.35
15.8009	209		0	911.818
15.8312	209		0.00570537	911.189
15.8615	209		0.0104627	911.516
15.8917	210		0.00190217	911.559
15.922	210		0	910.696
15.9523	210		0	909.65
15.9825	210		0.000951068	910.055
16.0128	211		0.0104648	909.664
16.0431	211		0.0275815	909.697
16.0733	211		0.0256805	909.866
16.1036	211		0.0313864	910.135
16.1339	212		0.0342423	910.452
16.1642	212		0.0266441	909.347
16.1944	212		0.0323631	906.971
16.2247	212		0.0304698	905.471
16.255	212		0.0237962	903.628
16.2852	213		0.0228445	902.167
16.3155	213		0.0123725	901.065
16.3458	213		0.019032	901.483
16.376	213		0.0237842	902.679
16.4063	214		0.0275794	903.813
16.4366	214		0.0351818	904.491
16.4669	214		0.0370828	904.425
16.4971	214		0.0342362	903.557
16.5274	215		0.0228198	901.114
16.5577	215		0.0171142	899.093
16.5879	215		0.0190186	898.651
16.6182	215		0.0209185	899.234
16.6485	216		0.0256752	899.901
16.6787	216		0.0294755	900.553
16.709	216		0.0380347	900.669
16.7393	216		0.0418291	900.341
16.7696	217		0.0342231	900.054
16.7998	217		0.0361237	898.974
16.8301	217		0.0370631	898.187
16.8604	217		0.0323166	897.533
16.8906	218		0.0209042	895.58
16.9209	218		0.0171044	893.146
16.9512	218		0	892.431
16.9814	218		0	892.456
17.0117	218		0	892.101
17.042	219		0	891.396
17.0723	219		0	890.75
17.1025	219		0	889.82
17.1328	219		0	889.24
17.1631	220		0	888.619
17.1933	220		0	887.425
17.2236	220		0	887.043
17.2539	220		0	886.51
17.2841	221		0	886.123
17.3144	221		0	886.228
17.3447	221		0	885.853
17.375	221		0	884.352
17.4052	222		0	882.462
17.4355	222		0	880.915
17.4658	222		0	879.765
17.496	222		0	878.958
17.5263	223		0	877.898
17.5566	223		0	876.644
17.5868	223		0	875.351
17.6171	223		0	874.351
17.6474	224		0	873.319
17.6777	224		0	872.001
17.7079	224		0	870.814
17.7382	224		0	869.505
17.7685	224		0	868.066
17.7987	225		0	866.812
17.829	225		0	866.299
17.8593	225		0	865.864
17.8895	225		0	865.48
17.9198	226		0	864.77
17.9501	226		0	864.185
17.9804	226		0	863.66
18.0106	226		0	863.918
18.0409	227		0	865.097
18.0712	227		0	866.216
18.1014	227		0	865.482
18.1317	227		0	864.418
18.162	228		0	864.714
18.1922	228		0	864.841
18.2225	228		0	863.079
18.2528	228		0	861.353
18.2831	229		0	861.891
18.3133	229		0	862.825
18.3436	229		0	863.576
18.3739	229		0	864.465
18.4041	229		0	866.092
18.4344	230		0	866.97
18.4647	230		0	867.166
18.4949	230		0.00759265	867.251
18.5252	231		0.0056939	867.327
18.5555	231		0.0237232	867.286
18.5858	231		0	867.026
18.616	231		0.00854344	866.968
18.6463	231		0.00379759	867.083
18.6766	232		0.0246848	868.451
18.7068	232		0.0047482	869.946
18.7371	232		0.0161468	871.518
18.7674	232		0.0151976	871.671
18.7976	233		0.00759669	872.438
18.8279	233		0	872.608
18.8582	233		0.017096	872.839
18.8885	233		0.031353	873.763
18.9187	234		0.0294565	875.434
18.949	234		0.0152138	877.344
18.9793	234		0.0180632	879.096
19.0095	234		0.0313718	878.946
19.0398	235		0.0313736	878.539
19.0701	235		0.0123615	878.694
19.1003	235		0.0123634	880.225
19.1306	235		0.0228256	881.207
19.1609	235		0.0266253	880.892
19.1912	236		0.0285244	880.155
19.2214	236		0.0256695	878.813
19.2517	236		0.0313727	877.927
19.282	236		0.0218727	878.269
19.3122	237		0.0180705	877.462
19.3425	237		0.0494706	875.39
19.3728	237		0.0380615	873.494
19.403	237		0.0685355	873.438
19.4333	238		0.0809277	874.221
19.4636	238		0.105711	874.367
19.4939	238		0.103795	875.157
19.5241	238		0.100969	875.32
19.5544	239		0.0714531	874.821
19.5847	239		0.073334	874.8
19.6149	239		0.0628613	875.859
19.6452	239		0.0752912	876.388
19.6755	240		0.0990646	875.863
19.7057	240		0.0885993	875.676
19.736	240		0.0790589	875.69
19.7663	240		0.0952472	875.777
19.7966	241		0.0971456	876.624
19.8268	241		0.0790393	877.057
19.8571	241		0.056198	875.546
19.8874	241		0.0752367	875.074
19.9176	242		0.0904409	874.021
19.9479	242		0.0923141	872.737
19.9782	242		0.0990137	872.039
20.0084	242		0.0923361	871.129
20.0387	242		0.0742574	870.498
20.069	243		0.0295196	872.071
20.0993	243		0.0447704	874.004
20.1295	243		0.052369	876.061
20.1598	244		0.0285673	877.914
20.1901	244		0.0209556	879.79
20.2203	244		0.0476104	881.509
20.2506	244		0.0666673	881.677
20.2809	245		0.0371322	881.627
20.3111	245		0.016178	882.187
20.3414	245		0.030462	884.673
20.3717	245		0.0190324	886.936
20.402	246		0.0285404	887.663
20.4322	246		0.0209191	888.799
20.4625	246		0.018068	889.75
20.4928	246		0.0237751	891.209
20.523	247		0.00475516	891.163
20.5533	247		0.0161609	890.823
20.5836	247		0.0199633	891.635
20.6138	247		0.00760196	892.435
20.6441	248		0.0019008	892.708
20.6744	248		0.0066514	894.715
20.7047	248		0.00855099	896.477
20.7349	248		0.00855351	898.453
20.7652	249		0.00380228	901.702
20.7955	249		0.00665444	905.183
20.8257	249		0.00570115	908.078
20.856	250		0	909.967
20.8863	250		0	909.375
20.9165	250		0	908.914
20.9468	250		0	909.798
20.9771	251		0	911.493
21.0074	251		0	912.265
21.0376	251		0	911.861
21.0679	251		0	911.548
21.0982	252		0	910.909
21.1284	252		0	911.51
21.1587	252		0	912.563
21.189	252		0	912.718
21.2192	253		0	912.183
21.2495	253		0	911.895
21.2798	253		0	911.684
21.3101	253		0	912.171
21.3403	254		0	912.601
21.3706	254		0	912.255
21.4009	254		0	912.363
21.4311	254		0.00569244	913.427
21.4614	255		0.0056919	914.294
21.4917	255		0	915.344
21.5219	255		0	916.588
21.5522	255		0	916.895
21.5825	256		0	916.786
21.6128	256		0	917.114
21.643	256		0	918.144
21.6733	256		0.00759987	919.183
21.7036	257		0	919.388
21.7338	257		0.00190063	919.108
21.7641	257		0.00855684	919.798
21.7944	257		0.00570331	920.399
21.8246	258		0	920.642
21.8549	258		0	921.491
21.8852	258		0	922.543
21.9155	259		0	923.544
21.9457	259		0	924.818
21.976	259		0	924.787
22.0063	259		0	924.102
22.0365	260		0	924.011
22.0668	260		0	925.084
22.0971	260		0	925.9
22.1273	260		0	925.971
22.1576	261		0	925.785
22.1879	261		0	925.368
22.2182	261		0	925.799
22.2484	261		0	926.194
22.2787	262		0	926.268
22.309	262		0	927.364
22.3392	262		0	928.673
22.3695	262		0	929.536
22.3998	263		0	930.309
22.43	263		0	931.949
22.4603	263		0	933.261
22.4906	264		0	934.61
22.5209	264		0	936.827
22.5511	264		0	939.595
22.5814	264		0	942.97
22.6117	265		0	945.706
22.6419	265		0	946.891
22.6722	265		0	947.931
22.7025	265		0	948.404
22.7327	266		0	948.829
22.763	266		0	949.058
22.7933	266		0	947.567
22.8235	266		0	943.88
22.8538	267		0	939.937
22.8841	267		0.237351	906.982
22.9144	267		0.16198	908.132
22.9446	267		0.0508331	908.978
22.9749	268		0.0169361	909.547
23.0052	268		0.0329328	910.203
23.0354	268		0.0423298	911.079
23.0657	268		0.0451637	911.181
23.096	269		0.0489301	910.002
23.1262	269		0.0517667	908.407
23.1565	269		0.0555414	907.094
23.1868	270		0.071586	905.486
23.2171	270		0.0668814	903.917
23.2473	270		0.066872	902.442
23.2776	270		0.0659177	901.23
23.3079	271		0.062168	899.647
23.3381	271		0.0537062	897.947
23.3684	271		0.0348619	896.063
23.3987	271		0.019779	893.983
23.4289	272		0.00847593	891.36
23.4592	272		0.0263701	888.139
23.4895	272		0.0461572	885.803
23.5198	272		0.0631182	885.249
23.55	273		0.0970179	885.852
23.5803	273		0.113043	886.151
23.6106	273		0.117722	885.458
23.6408	273		0.120476	884.531
23.6711	274		0.122326	885.711
23.7014	274		0.132577	886.368
23.7316	274		0.163585	885.822
23.7619	274		0.20402	884.121
23.7922	275		0.255702	882.179
23.8225	275		0.282048	881.391
23.8527	275		0.300484	881.909
23.883	275		0.316806	882.207
23.9133	276		0.337493	881.64
23.9435	276		0.351726	880.788
23.9738	276		0.365778	879.647
24.0041	276		0.366616	878.791
24.0343	277		0.387335	877.768
24.0646	277		0.395861	876.974
24.0949	277		0.405424	876.2
24.1252	278		0.420381	875.176
24.1554	278		0.433587	874.543
24.1857	278		0.452467	874.241
24.216	278		0.459181	873.814
24.2462	279		0.472474	872.845
24.2765	279		0.474602	872.492
24.3068	279		0.484059	872.421
24.337	279		0.486952	871.98
24.3673	280		0.488883	871.725
24.3976	280		0.486035	870.23
24.4279	280		0.485314	868.594
24.4581	280		0.477888	868.177
24.4884	281		0.459889	868.959
24.5187	281		0.447591	869.742
24.5489	281		0.432453	868.962
24.5792	281		0.418323	867.329
24.6095	282		0.400594	866.207
24.6397	282		0.370583	865.914
24.67	282		0.334033	865.596
24.7003	282		0.288941	864.461
24.7306	283		0.232543	863.55
24.7608	283		0.17235	863.621
24.7911	283		0.150673	864.48
24.8214	283		0.12717	865.121
24.8516	284		0.123435	864.656
24.8819	284		0.113073	864.1
24.9122	284		0.110254	864.074
24.9424	285		0.0905293	863.497
24.9727	285		0.0914853	863.7
25.003	285		0.0971386	865.089
25.0333	285		0.102811	867.197
25.0635	286		0.0933865	869.043
25.0938	286		0.11036	871.128
25.1241	286		0.121682	872.518
25.1543	286		0.118876	873.293
25.1846	287		0.0943183	872.442
25.2149	287		0.0641407	871.901
25.2451	287		0.0330282	872.133
25.2754	287		0.0122703	871.912
25.3057	288		0	871.471
25.336	288		0	871.839
25.3662	288		0	872.048
25.3965	288		0	871.862
25.4268	289		0	871.172
25.457	289		0	871.232
25.4873	289		0.00378083	871.134
25.5176	290		0.00378111	870.759
25.5478	290		0.00378122	870.575
25.5781	290		0.00283549	870.976
25.6084	290		0.00189059	871.604
25.6387	291		0	872.138
25.6689	291		0	872.433
25.6992	291		0	872.592
25.7295	291		0	872.169
25.7597	292		0	872.179
25.79	292		0	872.338
25.8203	292		0	872.254
25.8505	292		0.00945421	872.366
25.8808	293		0.0349961	872.671
25.9111	293		0.0511339	872.142
25.9414	293		0.0644324	871.848
25.9716	293		0.0768209	871.776
26.0019	294		0.0854174	871.485
26.0322	294		0.0959492	870.871
26.0624	294		0.109383	870.116
26.0927	294		0.119019	869.82
26.123	295		0.117202	869.926
26.1532	295		0.116306	871.157
26.1835	295		0.121103	874.008
26.2138	295		0.109627	876.428
26.2441	296		0.0781749	876.993
26.2743	296		0.0419335	876.876
26.3046	296		0.0199996	877.554
26.3349	296		0.0209257	878.373
26.3651	297		0.0189986	878.92
26.3954	297		0.00474221	879.009
26.4257	297		0	878.535
26.4559	298		0	878.035
26.4862	298		0	877.921
26.5165	298		0	877.94
26.5468	298		0	877.713
26.577	299		0	877.483
26.6073	299		0	877.509
26.6376	299		0	877.449
26.6678	299		0	876.924
26.6981	300		0	876.481
26.7284	300		0	876.261
26.7586	300		0	875.594
26.7889	300		0	874.023
26.8192	301		0	872.729
26.8495	301		0	871.742
26.8797	301		0	871.858
26.91	301		0	873.207
26.9403	302		0	873.986
26.9705	302		0.00380156	873.686
27.0008	302		0.0104585	873.576
27.0311	302		0.0123669	874.183
27.0613	303		0.00856759	874.826
27.0916	303		0	874.496
27.1219	303		0	873.559
27.1522	303		0	872.796
27.1824	304		0	872.207
27.2127	304		0	871.853
27.243	304		0	872.032
27.2732	305		0	871.569
27.3035	305		0	871.114
27.3338	305		0	871.261
27.364	305		0	871.614
27.3943	306		0	871.767
27.4246	306		0	871.534
27.4549	306		0	870.841
27.4851	306		0	869.999
27.5154	307		0	869.408
27.5457	307		0	869.112
27.5759	307		0	868.503
27.6062	307		0	867.236
27.6365	308		0	865.451
27.6667	308		0	863.597
27.697	308		0	862.194
27.7273	308		0	861.024
27.7576	309		0	860.901
27.7878	309		0	860.736
27.8181	309		0	859.627
27.8484	309		0	857.939
27.8786	310		0	857.198
27.9089	310		0	857.855
27.9392	310		0	858.742
27.9694	311		0	858.146
27.9997	311		0	857.034
28.03	311		0	855.389
28.0603	311		0	853.542
28.0905	312		0	852.771
28.1208	312		0.00190302	852.862
28.1511	312		0.00571064	853.406
28.1813	312		0.0076152	854.502
28.2116	313		0.00761549	854.656
28.2419	313		0.00857029	853.972
28.2721	313		0.00476277	854.509
28.3024	313		0.00857674	856.612
28.3327	314		0.0085787	858.848
28.363	314		0.0095338	860.146
28.3932	314		0.00763046	860.991
28.4235	314		0.00859025	861.209
28.4538	315		0.00858984	862.021
28.484	315		0.00859328	863.775
28.5143	315		0.00190989	865.337
28.5446	315		0	866.415
28.5748	316		0.00572989	868.341
28.6051	316		0.00191024	869.979
28.6354	316		0	871.32
28.6657	317		0	871.452
28.6959	317		0	871.33
28.7262	317		0	872.172
28.7565	317		0	873.236
28.7867	318		0	874.503
28.817	318		0.00573691	875.222
28.8473	318		0.0229467	875.658
28.8775	318		0.0191259	876.657
28.9078	319		0.0229564	876.913
28.9381	319		0.0420851	876.704
28.9684	319		0.0373049	877.127
28.9986	319		0.013391	878.74
29.0289	320		0.0105233	880.125
29.0592	320		0.00860873	881.418
29.0894	320		0.000956124	882.52
29.1197	320		0	882.928
29.15	321		0	882.167
29.1802	321		0	881.37
29.2105	321		0	880.736
29.2408	321		0.00478204	880.726
29.2711	322		0.00764753	879.565
29.3013	322		0.00286807	877.785
29.3316	322		0	876.2
29.3619	322		0	874.978
29.3921	323		0	873.708
29.4224	323		0	872.161
29.4527	323		0.00095605	870.925
29.4829	323		0.00764848	870.6
29.5132	324		0.00573636	870.899
29.5435	324		0.00382376	872.646
29.5738	324		0.00191223	874.793
29.604	325		0	876.794
29.6343	325		0	877.773
29.6646	325		0	878.96
29.6948	325		0	879.66
29.7251	326		0.00860388	880.124
29.7554	326		0	880.577
29.7856	326		0.00191219	881.672
29.8159	326		0.00669402	882.953
29.8462	327		0	883.105
29.8765	327		0	882.788
29.9067	327		0	882.787
29.937	327		0	883.461
29.9673	328		0.000957332	883.728
29.9975	328		0.00670299	883.888
30.0278	328		0.0105319	885.667
30.0581	329		0.020099	888.046
30.0883	329		0.0105302	889.566
30.1186	329		0.0076599	889.847
30.1489	330		0.00478698	890.189
30.1791	330		0.0105272	890.827
30.2094	330		0.0181803	892.054
30.2397	331		0.034461	892.38
30.27	331		0.0248954	891.9
30.3002	331		0.00383178	890.096
30.3305	332		0.00383314	886.955
30.3608	332		0.0076682	884.85
30.391	332		0.00862871	883.6
30.4213	333		0.00670948	881.973
30.4516	333		0.00479253	880.369
30.4818	333		0.00383274	879.456
30.5121	334		0.0191597	878.317
30.5424	334		0.0287244	876.393
30.5727	334		0.033496	874.409
30.6029	335		0.0306167	871.999
30.6332	335		0.0267858	870.634
30.6635	335		0.024864	870.397
30.6937	336		0.0200853	869.38
30.724	336		0.012437	867.745
30.7543	336		0.0105224	866.31
30.7845	337		0.00478446	866.159
30.8148	337		0	866.146
30.8451	338		0	866.379
30.8754	338		0	866.4
30.9056	338		0	866.886
30.9359	339		0	867.611
30.9662	339		0	868.146
30.9964	339		0	868.573
31.0267	340		0	869.901
31.057	340		0.000955447	870.675
31.0872	340		0.00668775	870.625
31.1175	341		0.00573318	870.865
31.1478	341		0.00573154	872.147
31.1781	341		0.0047756	873.092
31.2083	342		0.00382022	872.931
31.2386	342		0.000954964	871.7
31.2689	342		0.0334234	871.342
31.2991	343		0.0611486	871.386
31.3294	343		0.087876	871.994
31.3597	343		0.101243	873.258
31.3899	344		0.0974128	873.716
31.4202	344		0.0754595	873.994
31.4505	344		0.0372496	874.544
31.4808	345		0.00859377	874.656
31.511	345		0.0171864	874.829
31.5413	345		0.0286377	874.805
31.5716	346		0.0362627	874.972
31.6018	346		0.0353279	875.706
31.6321	346		0.0295974	875.939
31.6624	347		0.0210032	876.226
31.6926	347		0.0181429	876.735
31.7229	347		0.0171923	876.446
31.7532	348		0.0373896	876.248
31.7835	348		0.0355441	875.784
31.8137	348		0.0192385	874.877
31.844	349		0.0192521	873.524
31.8743	349		0.0153837	872.226
31.9045	349		0.0201743	871.87
31.9348	350		0.0211013	872.357
31.9651	350		0.0201147	872.606
31.9953	351		0.00860018	871.967
32.0256	351		0	871.127
32.0559	351		0	870.706
32.0862	352		0	870.965
32.1164	352		0.00190847	871.801
32.1467	352		0.00381661	872.597
32.177	353		0.00572459	873.489
32.2072	353		0.00668035	873.901
32.2375	353		0.00667933	874.719
32.2678	354		0.00190767	876.174
32.298	354		0.00190794	876.704
32.3283	354		0	876.181
32.3586	355		0	875.615
32.3889	355		0	875.102
32.4191	355		0	875.17
32.4494	356		0	875.812
32.4797	356		0.000955712	876.492
32.5099	356		0.00286689	875.939
32.5402	357		0.00860108	875.789
32.5705	357		0.00668775	875.443
32.6007	357		0.00381883	874.551
32.631	358		0.00286284	873.285
32.6613	358		0.00381588	872.329
32.6916	358		0.00381432	871.05
32.7218	359		0.00285965	869.775
32.7521	359		0.00190707	868.15
32.7824	359		0.000953243	865.978
32.8126	360		0	864.508
32.8429	360		0	863.767
32.8732	360		0	863.602
32.9034	361		0.00952907	863.267
32.9337	361		0.0371436	862.349
32.964	362		0.0419	861.969
32.9943	362		0.0380778	861.13
33.0245	362		0.0257016	860.304
33.0548	363		0.0209358	859.781
33.0851	363		0.022838	859.208
33.1153	363		0.0228352	858.874
33.1456	364		0.0180748	858.517
33.1759	364		0.0104621	858.267
33.2061	364		0.00475403	858.166
33.2364	365		0.00760391	857.383
33.2667	365		0.000950272	856.835
33.297	365		0.0056999	855.931
33.3272	366		0.00664805	854.991
33.3575	366		0.00284846	854.516
33.3878	366		0.00854482	854.849
33.418	367		0.00569698	856.126
33.4483	367		0	857.727
33.4786	367		0	858.32
33.5088	368		0	858.389
33.5391	368		0	858.849
33.5694	368		0	858.853
33.5997	369		0	858.387
33.6299	369		0	857.57
33.6602	369		0	857.633
33.6905	370		0	858.358
33.7207	370		0	858.87
33.751	370		0	858.948
33.7813	371		0	858.664
33.8115	371		0	858.03
33.8418	371		0	857.398
33.8721	372		0.00379061	857.198
33.9024	372		0.00473839	856.878
33.9326	373		0.000947724	856.932
33.9629	373		0	857.737
33.9932	373		0	857.877
34.0234	374		0	857.008
34.0537	374		0	855.216
34.084	374		0	853.39
34.1142	375		0	852.349
34.1445	375		0	851.906
34.1748	375		0	852.208
34.2051	376		0.000947284	853.024
34.2353	376		0.00284207	853.792
34.2656	376		0.00284204	854.214
34.2959	377		0.00094732	854.582
34.3261	377		0	854.954
34.3564	377		0	855.402
34.3867	378		0	855.213
34.4169	378		0	853.952
34.4472	378		0	852.31
34.4775	379		0	851.482
34.5078	379		0	851.248
34.538	379		0	850.71
34.5683	380		0	850.25
34.5986	380		0	849.892
34.6288	380		0	849.64
34.6591	381		0.00659488	849.73
34.6894	381		0.00753487	850.038
34.7196	381		0	850.056
34.7499	382		0	850.161
34.7802	382		0	850.878
34.8105	382		0	851.152
34.8407	383		0	850.725
34.871	383		0	850.026
34.9013	383		0	849.448
34.9315	384		0	849.104
34.9618	384		0	849.02
34.9921	385		0	849.116
35.0223	385		0	849.539
35.0526	385		0	849.529
35.0829	386		0	849.388
35.1132	386		0	849.604
35.1434	386		0	850.128
35.1737	387		0	852.025
35.204	387		0	853.988
35.2342	387		0	855.394
35.2645	388		0	856.169
35.2948	388		0	855.965
35.325	388		0	856.092
35.3553	389		0	856.572
35.3856	389		0	857.504
35.4159	389		0	858.034
35.4461	390		0	857.9
35.4764	390		0	857.644
35.5067	390		0	857.415
35.5369	391		0	856.759
35.5672	391		0	856.313
35.5975	391		0	856.945
35.6277	392		0	857.77
35.658	392		0.00562942	857.565
35.6883	392		0.0159463	856.702
35.7186	393		0.0196932	856.198
35.7488	393		0.0159416	855.769
35.7791	393		0.00562725	854.714
35.8094	394		0	853.726
35.8396	394		0	853.226
35.8699	394		0	853.354
35.9002	395		0	852.897
35.9304	395		0	851.471
35.9607	396		0	849.819
35.991	396		0	849.39
36.0213	396		0	849.438
36.0515	397		0	848.382
36.0818	397		0	846.796
36.1121	397		0	845.87
36.1423	398		0	845.03
36.1726	398		0	844.349
36.2029	398		0	844.506
36.2331	399		0	845.121
36.2634	399		0	844.842
36.2937	399		0	844.41
36.324	400		0	844.745
36.3542	400		0.00280702	845.29
36.3845	400		0.00654989	844.603
36.4148	401		0	843.102
36.445	401		0	842.306
36.4753	401		0.00187026	842.698
36.5056	402		0.00467395	842.345
36.5358	402		0.000934999	841.206
36.5661	402		0.00186989	840.103
36.5964	403		0.00373996	838.461
36.6267	403		0.00374094	836.968
36.6569	403		0.00374038	836.412
36.6872	404		0.00374017	836.443
36.7175	404		0.000934719	836.241
36.7477	404		0	835.509
36.778	405		0	834.638
36.8083	405		0	833.546
36.8385	405		0	832.793
36.8688	406		0.00280353	833.073
36.8991	406		0.0065401	834.08
36.9294	407		0.00560611	833.895
36.9596	407		0	832.238
36.9899	407		0	829.631
37.0202	408		0	827.431
37.0504	408		0	826.311
37.0807	408		0	825.69
37.111	409		0	824.971
37.1412	409		0.000934658	824.998
37.1715	409		0.00841389	825.117
37.2018	410		0.00841318	824.558
37.2321	410		0.00747936	823.171
37.2623	410		0.00841546	822.039
37.2926	411		0.00280505	821.59
37.3229	411		0	821.161
37.3531	411		0	820.691
37.3834	412		0	820.669
37.4137	412		0	820.454
37.4439	412		0.00374301	820.094
37.4742	413		0.00561367	819.268
37.5045	413		0.00655026	817.833
37.5348	413		0.00748545	816.139
37.565	414		0.00842121	814.761
37.5953	414		0.00655051	814.341
37.6256	414		0.0102953	814.414
37.6558	415		0.0112322	814.186
37.6861	415		0.0131038	814.16
37.7164	415		0.0140406	814.126
37.7466	416		0.0121699	814.002
37.7769	416		0.00748902	812.999
37.8072	416		0.00655198	812
37.8374	417		0.00842405	811.589
37.8677	417		0.0102959	810.695
37.898	418		0.00561808	808.815
37.9283	418		0.010303	807.534
37.9585	418		0.0140506	806.899
37.9888	419		0.0149872	806.296
38.0191	419		0.00655725	805.42
38.0493	419		0.00655848	804.532
38.0796	420		0.0112402	803.513
38.1099	420		0.0084306	802.467
38.1401	420		0.0102987	802.147
38.1704	421		0.0112365	802.848
38.2007	421		0.0140417	803.867
38.231	421		0.0131065	804.056
38.2612	422		0.0215358	803.503
38.2915	422		0.028087	803.079
38.3218	422		0.0234082	802.566
38.352	423		0.0140396	802.298
38.3823	423		0.0121659	802.46
38.4126	423		0.0168483	803.301
38.4428	424		0.0121648	803.972
38.4731	424		0.00748356	804.482
38.5034	424		0	804.441
38.5337	425		0	803.933
38.5639	425		0	803.864
38.5942	425		0.000936207	804.4
38.6245	426		0.00280883	805.49
38.6547	426		0.00936601	806.093
38.685	426		0.014048	805.749
38.7153	427		0.0149879	804.564
38.7455	427		0.0271703	803.286
38.7758	427		0.0337274	802.474
38.8061	428		0.0402927	802.587
38.8364	428		0.0402976	802.77
38.8666	429		0.0365439	802.856
38.8969	429		0.037482	802.417
38.9272	429		0.03841	801.32
38.9574	430		0.0384118	799.981
38.9877	430		0.0402757	798.948
39.018	430		0.0356042	798.302
39.0482	431		0.0309232	797.41
39.0785	431		0.0374707	796.884
39.1088	431		0.0524379	797.092
39.1391	432		0.0505547	797.923
39.1693	432		0.0215311	798.194
39.1996	432		0.0112314	798.732
39.2299	433		0.00467757	799.347
39.2601	433		0	799.861
39.2904	433		0	799.896
39.3207	434		0	799.181
39.3509	434		0	798.32
39.3812	434		0	798.177
39.4115	435		0	798.681
39.4418	435		0.00186843	799.903
39.472	435		0.00186769	800.469
39.5023	436		0.0046701	800.315
39.5326	436		0.00186745	799.991
39.5628	436		0.00280075	798.71
39.5931	437		0.00559696	797.361
39.6234	437		0.0167851	797.095
39.6536	437		0.00186402	797.844
39.6839	438		0	797.608
39.7142	438		0.00558623	796.785
39.7445	438		0.00465311	796.991
39.7747	439		0	797.573
39.805	439		0	797.308
39.8353	440		0	796.51
39.8655	440		0	796.551
39.8958	440		0	797.184
39.9261	441		0	797.715
39.9563	441		0	796.57
39.9866	441		0	794.936
40.0169	442		0	793.898
40.0472	442		0	793.286
40.0774	442		0	793.121
40.1077	443		0	792.659
40.138	443		0	791.732
40.1682	443		0	791.613
40.1985	444		0	791.815
40.2288	444		0	791.696
40.259	445		0	791.163
40.2893	445		0	790.587
40.3196	445		0	790.059
40.3499	446		0.00370686	790.323
40.3801	446		0.00741434	790.957
40.4104	447		0	791.287
40.4407	447		0.00463426	791.835
40.4709	447		0.00555818	792.63
40.5012	448		0.000926475	793.178
40.5315	448		0	792.486
40.5617	448		0	791.169
40.592	449		0	790.481
40.6223	449		0	789.774
40.6526	450		0.00277927	789.565
40.6828	450		0.00370532	789.782
40.7131	450		0.0101891	789.584
40.7434	451		0.0268538	788.537
40.7736	451		0.0351836	787.461
40.8039	451		0.0370288	786.776
40.8342	452		0.034252	786.252
40.8644	452		0.022215	786.589
40.8947	453		0.00370209	787.095
40.925	453		0	787.686
40.9553	454		0	787.942
40.9855	454		0	787.48
41.0158	454		0	787.231
41.0461	455		0	787.843
41.0763	455		0.00370206	789.02
41.1066	455		0.017583	790.435
41.1369	456		0.019434	792.243
41.1671	456		0.0120289	793.95
41.1974	457		0.00647764	794.673
41.2277	457		0	794.172
41.258	457		0	794.094
41.2882	458		0	793.928
41.3185	458		0	794.126
41.3488	458		0	795.382
41.379	459		0	797.156
41.4093	459		0	798.693
41.4396	460		0.00554831	799.944
41.4698	460		0.0406921	800.524
41.5001	460		0.0481014	800.736
41.5304	461		0.0471903	800.804
41.5607	461		0.0426542	800.268
41.5909	462		0.0241337	801.193
41.6212	462		0.0185815	803.322
41.6515	462		0.00185894	805.327
41.6817	463		0.00464529	805.702
41.712	463		0.0185741	804.615
41.7423	463		0.0157786	803.724
41.7725	464		0.00278167	802.705
41.8028	464		0.00926303	802.144
41.8331	465		0	802.811
41.8634	465		0	804.228
41.8936	465		0	805.854
41.9239	466		0	806.716
41.9542	466		0	807.049
41.9844	466		0	807.063
42.0147	467		0	807.486
42.045	467		0	807.306
42.0752	468		0	806.817
42.1055	468		0	807.225
42.1358	468		0	806.955
42.1661	469		0	805.938
42.1963	469		0	805.07
42.2266	470		0	804.562
42.2569	470		0	804.425
42.2871	470		0.000923344	804.529
42.3174	471		0.00276988	804.702
42.3477	471		0.00461804	804.712
42.3779	472		0	805.17
42.4082	472		0	805.2
42.4385	472		0.00369665	804.526
42.4688	473		0.0110877	804.681
42.499	473		0.0138598	805.282
42.5293	473		0.0120109	805.36
42.5596	474		0.0120077	805.008
42.5898	474		0.00923651	805.352
42.6201	475		0.00831217	805.928
42.6504	475		0.00738614	806.15
42.6806	475		0.0101557	805.141
42.7109	476		0.00646204	803.368
42.7412	476		0.00369167	802.054
42.7715	476		0.00830511	801.823
42.8017	477		0.00276796	802.692
42.832	477		0	803.384
42.8623	478		0	802.982
42.8925	478		0.000922441	801.825
42.9228	478		0.00461178	800.779
42.9531	479		0.00553306	800.229
42.9833	479		0.00645387	799.406
43.0136	480		0.00645417	799.066
43.0439	480		0.0073766	799.408
43.0742	480		0.00829845	799.834
43.1044	481		0.00921837	800.628
43.1347	481		0.00737565	801.801
43.165	481		0.0101423	803.17
43.1952	482		0.0110667	804.406
43.2255	482		0.00922186	805.261
43.2558	483		0.0046111	805.883
43.286	483		0.00461153	806.561
43.3163	483		0.00368997	806.323
43.3466	484		0.00368953	804.736
43.3769	484		0.00184452	803.542
43.4071	485		0	803.612
43.4374	485		0	804.01
43.4677	485		0.00368772	804.033
43.4979	486		0.00553199	804.15
43.5282	486		0.00460982	805.073
43.5585	487		0.000921931	806.967
43.5887	487		0.000921888	809.097
43.619	487		0.000921633	810.403
43.6493	488		0.00737144	811.041
43.6796	488		0.00921379	811.281
43.7098	488		0.00368518	810.565
43.7401	489		0	809.28
43.7704	489		0	808.174
43.8006	490		0.00460494	807.969
43.8309	490		0.00460532	808.543
43.8612	490		0.0018421	809.069
43.8914	491		0.00276312	809.397
43.9217	491		0.000921141	809.346
43.952	491		0.0036848	809.1
43.9823	492		0.00644935	809.047
44.0125	492		0.00644846	809.413
44.0428	493		0	810.271
44.0731	493		0	811.213
44.1033	493		0	811.341
44.1336	494		0	810.818
44.1639	494		0	810.256
44.1941	495		0	809.218
44.2244	495		0.00920539	807.768
44.2547	495		0.0138067	807.21
44.285	496		0.0184106	807.231
44.3152	496		0.0147274	807.279
44.3455	497		0.0202541	807.339
44.3758	497		0.023015	807.48
44.406	497		0.0294629	807.57
44.4363	498		0.0174951	807.078
44.4666	498		0.000920649	806.913
44.4968	498		0.0165746	807.021
44.5271	499		0.0147293	808.236
44.5574	499		0.00828676	810.281
44.5877	500		0.00552563	812.086
44.6179	500		0.00368419	813.633
44.6482	500		0.00276246	815.214
44.6785	501		0	816.011
44.7087	501		0	816.263
44.739	502		0	816.86
44.7693	502		0	818.124
44.7995	502		0	819.089
44.8298	503		0	819.615
44.8601	503		0	820.619
44.8904	503		0	821.745
44.9206	504		0	822.212
44.9509	504		0	822.165
44.9812	505		0	822.02
45.0114	505		0	822.166
45.0417	505		0	821.778
45.072	506		0.00549843	821.002
45.1022	506		0.00549848	820.626
45.1325	506		0.00458207	821.066
45.1628	507		0.0036665	821.5
45.193	507		0	821.6
45.2233	508		0	821.375
45.2536	508		0	821.32
45.2839	508		0	822.432
45.3141	509		0	824.077
45.3444	509		0	825.646
45.3747	510		0.000916531	827.123
45.4049	510		0.00549879	828.636
45.4352	510		0.00458186	830.105
45.4655	511		0.00091675	830.892
45.4957	511		0	832.27
45.526	512		0	833.808
45.5563	512		0	833.959
45.5866	512		0.00183395	833.727
45.6168	513		0.011919	833.614
45.6471	513		0.0155856	833.671
45.6774	513		0.0192496	833.954
45.7076	514		0.0192514	834.031
45.7379	514		0.0201689	834.172
45.7682	515		0.0210858	834.449
45.7984	515		0.0229251	834.753
45.8287	515		0.0165109	834.96
45.859	516		0.00825499	835.812
45.8893	516		0.01009	836.976
45.9195	516		0.0229276	837.261
45.9498	517		0.0330121	837.617
45.9801	517		0.0476806	838.317
46.0103	518		0.0788513	839.205
46.0406	518		0.0916918	840.123
46.0709	518		0.0880177	840.984
46.1011	519		0.0797587	841.852
46.1314	519		0.0797755	842.504
46.1617	520		0.0742683	843.264
46.192	520		0.0742656	843.204
46.2222	520		0.0761126	842.623
46.2525	521		0.0816304	842.239
46.2828	521		0.0706241	841.978
46.313	521		0.05595	842.005
46.3433	522		0.0596188	842.551
46.3736	522		0.0605399	842.717
46.4038	523		0.058707	842.654
46.4341	523		0.0559505	842.794
46.4644	523		0.0394553	843.471
46.4947	524		0.0321074	844.103
46.5249	524		0.0412836	844.124
46.5552	525		0.0339512	844.531
46.5855	525		0.0339549	844.957
46.6157	525		0.0357854	846.19
46.646	526		0.0449455	847.164
46.6763	526		0.03943	847.078
46.7065	527		0.0302569	846.595
46.7368	527		0.0210852	846.144
46.7671	527		0.0201613	846.204
46.7974	528		0.0210731	846.609
46.8276	528		0.0238268	846.911
46.8579	528		0.0283989	846.991
46.8882	529		0.0265668	847.039
46.9184	529		0.0302322	847.001
46.9487	530		0.0238233	847.37
46.979	530		0.028407	848.153
47.0092	530		0.0274849	849.615
47.0395	531		0.0210735	851.203
47.0698	531		0.0192389	852.233
47.1001	531		0.0238161	852.609
47.1303	532		0.0210702	852.416
47.1606	532		0.0311515	851.939
47.1909	533		0.0540635	851.099
47.2211	533		0.0687166	850.848
47.2514	533		0.0714672	851.185
47.2817	534		0.0742064	851.942
47.3119	534		0.0769463	852.839
47.3422	535		0.0815437	853.033
47.3725	535		0.0870633	852.903
47.4028	535		0.0934537	852.461
47.433	536		0.0870402	851.965
47.4633	536		0.0705516	851.843
47.4936	536		0.062311	852.265
47.5238	537		0.0641302	852.963
47.5541	537		0.0595702	854.327
47.5844	538		0.0476609	855.304
47.6146	538		0.0421755	856.263
47.6449	538		0.0293355	856.968
47.6752	539		0.0220004	857.48
47.7055	539		0.0238482	857.56
47.7357	540		0.0183429	857.421
47.766	540		0.0210916	858.217
47.7963	540		0.021098	859.639
47.8265	541		0.0220123	860.49
47.8568	541		0.0256794	860.506
47.8871	542		0.0247666	859.587
47.9173	542		0.0192562	860.127
47.9476	542		0.0183384	861.582
47.9779	543		0.0192547	862.451
48.0082	543		0.0201781	862.952
48.0384	543		0.0165091	863.366
48.0687	544		0.0128399	863.497
48.099	544		0.0110078	863.988
48.1292	545		0.0137606	864.292
48.1595	545		0.0146727	864.578
48.1898	545		0.0165104	865.218
48.22	546		0.0183441	866.798
48.2503	546		0.0146706	868.013
48.2806	546		0.00550151	868.859
48.3109	547		0	869.775
48.3411	547		0.00825362	870.534
48.3714	548		0.0165115	870.739
48.4017	548		0.0128472	870.402
48.4319	548		0.00734006	870.064
48.4622	549		0.0128493	870.131
48.4925	549		0.0128505	870.113
48.5227	550		0.0247886	870.414
48.553	550		0.0201913	869.45
48.5833	550		0.0174354	867.611
48.6136	551		0.0174438	865.853
48.6438	551		0.0192875	865.528
48.6741	551		0.017445	866.515
48.7044	552		0.0192869	867.117
48.7346	552		0.0110215	867.283
48.7649	553		0.00918687	867.503
48.7952	553		0.00183776	867.811
48.8254	553		0.00827312	867.98
48.8557	554		0.00919591	866.851
48.886	554		0.00459593	865.295
48.9163	555		0.00551592	864.571
48.9465	555		0.00275778	864.279
48.9768	555		0.000919101	864.3
49.0071	556		0.00091932	864.991
49.0373	556		0.00643678	865.411
49.0676	556		0.00735734	864.787
49.0979	557		0.00459977	863.683
49.1281	557		0.000920302	862.967
49.1584	558		0	862.745
49.1887	558		0	863.157
49.219	558		0	863.288
49.2492	559		0	863.603
49.2795	559		0	863.778
49.3098	560		0	864.258
49.34	560		0.00369242	864.561
49.3703	560		0.0101628	864.401
49.4006	561		0.0175615	863.482
49.4308	561		0.0092495	862.7
49.4611	561		0	862.408
49.4914	562		0	862.57
49.5217	562		0	863.474
49.5519	563		0.000924146	864.081
49.5822	563		0.00739255	864.305
49.6125	563		0.00739474	863.933
49.6427	564		0	863.745
49.673	564		0	864.355
49.7033	564		0.00462039	864.994
49.7335	565		0.00369522	865.95
49.7638	565		0.0110874	866.365
49.7941	566		0.00369614	866.014
49.8244	566		0.00369607	865.076
49.8546	566		0.00924052	864.217
49.8849	567		0.0120178	863.414
49.9152	567		0.00831908	863.398
49.9454	568		0.0120173	863.618
49.9757	568		0.01294	863.278
50.006	568		0.0110949	863.246
50.0362	569		0.0157071	863.719
50.0665	569		0.0083147	865.206
50.0968	570		0.0110851	866.218
50.1271	570		0.0341631	865.989
50.1573	570		0.0295541	864.751
50.1876	571		0.0258563	864.342
50.2179	571		0.0166167	865.272
50.2481	571		0.00461514	865.627
50.2784	572		0.00184746	866.028
50.3087	572		0.00554477	866.935
50.3389	572		0.0267859	867.078
50.3692	573		0.0221496	866.212
50.3995	573		0.00922671	864.722
50.4298	574		0	864.558
50.46	574		0	864.937
50.4903	574		0	865.637
50.5206	575		0.0036916	866.491
50.5508	575		0.00553659	867.351
50.5811	575		0.0166171	867.914
50.6114	576		0.0249305	869.004
50.6416	576		0.0313931	870.127
50.6719	576		0.0286319	871.52
50.7022	577		0.0175458	873.13
50.7325	577		0.026779	874.558
50.7627	578		0.0313731	875.341
50.793	578		0.025826	874.92
50.8233	578		0.0175164	874.477
50.8535	579		0.0147547	875.03
50.8838	579		0.0313474	876.005
50.9141	579		0.0543864	875.98
50.9443	580		0.0313298	877.244
50.9746	580		0.0377678	877.198
51.0049	580		0.0543513	875.553
51.0352	581		0.0423787	875.665
51.0654	581		0.0515739	877.508
51.0957	582		0.0377466	878.946
51.126	582		0.039585	879.683
51.1562	582		0.0377317	879.667
51.1865	583		0.0414143	880.339
51.2168	583		0.0506101	882.013
51.247	584		0.0469173	882.183
51.2773	584		0.0423315	882.571
51.3076	584		0.0451035	882.576
51.3379	585		0.0469587	882.632
51.3681	585		0.0589199	883.901
51.3984	585		0.0405022	884.95
51.4287	586		0.0165689	884.127
51.4589	586		0.0267096	884.141
51.4892	586		0.0580693	884.355
51.5195	587		0.0516158	883.46
51.5497	587		0.0764956	883.045
51.58	588		0.0553301	881.474
51.6103	588		0.0571729	880.732
51.6406	588		0.0571171	881.335
51.6708	589		0.0543488	882.171
51.7011	589		0.0718225	880.374
51.7314	589		0.115033	879.071
51.7616	590		0.143492	880.081
51.7919	590		0.113993	881.991
51.8222	590		0.0707643	883.14
51.8524	591		0.0486989	882.872
51.8827	591		0.0514441	881.206
51.913	592		0.082713	880.699
51.9433	592		0.0624925	881.091
51.9735	592		0.0909483	881.185
52.0038	593		0.0560384	880.2
52.0341	593		0.0725523	877.409
52.0643	593		0.0982995	876.044
52.0946	594		0.0762601	874.449
52.1249	594		0.100096	872.932
52.1551	595		0.0771463	873.816
52.1854	595		0.0605999	876.083
52.2157	595		0.0468255	878.124
52.246	596		0.0541841	879.386
52.2762	596		0.0670494	880.436
52.3065	596		0.0514229	880.649
52.3368	597		0.0266294	879.586
52.367	597		0.0275444	877.562
52.3973	598		0.0266248	876.736
52.4276	598		0.0330724	877.86
52.4578	598		0.0266453	879.235
52.4881	599		0.0229691	880.965
52.5184	599		0.0174591	882.333
52.5487	599		0.026664	882.826
52.5789	600		0.0211514	882.283
52.6092	600		0.00184015	881.62
52.6395	600		0.0248374	881.841
52.6697	601		0.0303635	881.244
52.7	601		0.0128875	880.323
52.7303	602		0.0221076	880.135
52.7605	602		0.0276406	880.588
52.7908	602		0.0138366	881.435
52.8211	603		0.012916	882
52.8513	603		0.0138484	882.373
52.8816	603		0.00923907	882.554
52.9119	604		0.00092395	882.814
52.9422	604		0.000924172	881.971
52.9724	604		0	882.002
53.0027	605		0.00647004	882.964
53.033	605		0.0110923	882.84
53.0632	606		0.0129413	882.884
53.0935	606		0.0268062	882.279
53.1238	606		0.0342007	881.463
53.154	607		0.0110875	881.486
53.1843	607		0.00553991	880.864
53.2146	607		0.0203104	880.058
53.2449	608		0.0323188	878.852
53.2751	608		0.0470784	878.081
53.3054	609		0.0387658	877.506
53.3357	609		0.039677	877.605
53.3659	609		0.0313633	876.813
53.3962	610		0.0212079	876.29
53.4265	610		0.0184429	875.646
53.4567	610		0.0184276	875.337
53.487	611		0.0165793	874.987
53.5173	611		0.0101293	874.916
53.5476	612		0.0119623	876.176
53.5778	612		0.00551861	879.039
53.6081	612		0	879.752
53.6384	613		0	880.149
53.6686	613		0.000919304	880.669
53.6989	613		0.00826818	880.308
53.7292	614		0.0110219	879.904
53.7594	614		0.00918189	879.578
53.7897	614		0	879.415
53.82	615		0.0100948	880.507
53.8503	615		0.0183503	882.157
53.8805	616		0.00917499	883.517
53.9108	616		0.00825506	884.777
53.9411	616		0.0100883	885.136
53.9713	617		0.00733346	885.811
54.0016	617		0.0100828	885.216
54.0319	617		0.00366653	884.598
54.0621	618		0.000916868	882.84
54.0924	618		0	880.131
54.1227	618		0	879.043
54.153	619		0.0064189	879.96
54.1832	619		0.0137477	881.798
54.2135	620		0.0201557	882.052
54.2438	620		0.00641678	883.081
54.274	620		0.00366606	885.746
54.3043	621		0.0192424	887.704
54.3346	621		0.0256612	887.146
54.3648	621		0.0155836	888.551
54.3951	622		0.0109996	890.681
54.4254	622		0.00916716	892.135
54.4557	623		0.00366519	891.781
54.4859	623		0.00458039	892.208
54.5162	623		0.00733178	893.987
54.5465	624		0.00824992	895.024
54.5767	624		0.00366603	896.27
54.607	624		0.00457947	898.654
54.6373	625		0.00549269	900.055
54.6675	625		0.00732058	899.56
54.6978	626		0.0109815	898.756
54.7281	626		0.0109744	898.246
54.7584	626		0.0100601	897.815
54.7886	627		0.00640275	899.013
54.8189	627		0	900.461
54.8492	627		0	899.175
54.8794	628		0	896.675
54.9097	628		0	895.174
54.94	628		0.00182618	895.162
54.9702	629		0.0136742	895.558
55.0005	629		0.0255011	894.675
55.0308	630		0.0154795	893.298
55.0611	630		0.0163866	892.499
55.0913	630		0.0081912	892.275
55.1216	631		0.00909479	891.181
55.1519	631		0.00909017	891.306
55.1821	631		0.0100024	892.921
55.2124	632		0.00909124	893.8
55.2427	632		0.00545326	894.601
55.2729	632		0.00181755	894.219
55.3032	633		0.00544905	892.405
55.3335	633		0.0181609	890.88
55.3638	634		0.0326869	889.83
55.394	634		0.0163443	890.183
55.4243	634		0.0117928	891.883
55.4546	635		0.0117603	892.723
55.4848	635		0.0126565	892.864
55.5151	636		0.00451888	893.195
55.5454	636		0	893.734
55.5756	636		0.00270719	894.011
55.6059	637		0.00270653	893.48
55.6362	637		0.0018039	893.072
55.6665	637		0.00270536	893.334
55.6967	638		0.00360747	894.257
55.727	638		0.00540979	896.212
55.7573	638		0.00450804	897.14
55.7875	639		0.00450548	896.482
55.8178	639		0.00180154	894.993
55.8481	640		0.00360198	894.404
55.8783	640		0.00630415	894.405
55.9086	640		0.00720448	895.578
55.9389	641		0.00630086	896.938
55.9692	641		0.00629955	896.332
55.9994	641		0.00360136	895.508
56.0297	642		0.00540146	895.021
56.06	642		0.00720059	895.154
56.0902	642		0.00810212	895.328
56.1205	643		0.00630029	895.283
56.1508	643		0.00899969	895.914
56.181	644		0.00810037	896.603
56.2113	644		0.00180037	897.261
56.2416	644		0	897.465
56.2719	645		0	897.891
56.3021	645		0	898.651
56.3324	645		0.00180102	899.04
56.3627	646		0.00450357	900.264
56.3929	646		0.00540322	901.525
56.4232	646		0.00270156	901.529
56.4535	647		0.00360159	901.426
56.4837	647		0.00360393	901.327
56.514	648		0.00360419	901.176
56.5443	648		0.00720818	901.123
56.5746	648		0.00630955	902.136
56.6048	649		0.01352	902.97
56.6351	649		0.0135233	903.265
56.6654	650		0.00540984	904.474
56.6956	650		0	905.585
56.7259	650		0	906.299
56.7562	651		0	907.131
56.7864	651		0	907.274
56.8167	651		0	906.533
56.847	652		0	905.965
56.8773	652		0	905.434
56.9075	652		0	905.702
56.9378	653		0	906.251
56.9681	653		0	907.813
56.9983	654		0	909.645
57.0286	654		0	910.457
57.0589	654		0	911.435
57.0891	655		0.00269821	912.701
57.1194	655		0.00359686	914.806
57.1497	655		0.00269702	916.168
57.18	656		0	918.023
57.2102	656		0	919.407
57.2405	656		0.00359341	921.088
57.2708	657		0.00988311	923.534
57.301	657		0.0161693	926.704
57.3313	658		0.0170668	930.175
57.3616	658		0.00898287	932.349
57.3918	658		0.00269476	933.591
57.4221	659		0	934.477
57.4524	659		0	934.991
57.4827	659		0	935.556
57.5129	660		0	935.817
57.5432	660		0	936.169
57.5735	660		0	937.258
57.6037	661		0	938.044
57.634	661		0	937.988
57.6643	662		0	938.173
57.6945	662		0	938.913
57.7248	662		0.0134696	940.881
57.7551	663		0.0484918	942.138
57.7854	663		0.0583514	942.958
57.8156	663		0.0628541	944.28
57.8459	664		0.0637606	944.737
57.8762	664		0.060195	945.47
57.9064	665		0.0404451	947.885
57.9367	665		0.0368612	950.123
57.967	665		0.0278684	951.444
57.9972	666		0.0260634	951.166
58.0275	666		0.0215756	948.632
58.0578	666		0.00809149	946.472
58.0881	667		0.0053953	945.899
58.1183	667		0.00809513	946.049
58.1486	668		0.00539763	946.479
58.1789	668		0	946.517
58.2091	668		0	945.903
58.2394	669		0	945.966
58.2697	669		0	946.951
58.2999	669		0	948.7
58.3302	670		0	949.568
58.3605	670		0.00630466	948.966
58.3908	670		0.00720636	947.098
58.421	671		0.00810774	946.408
58.4513	671		0.00721065	945.952
58.4816	672		0.00540906	944.976
58.5118	672		0.00360835	944.035
58.5421	672		0.00360838	943.009
58.5724	673		0.0153387	941.656
58.6026	673		0.0126299	940.022
58.6329	673		0.00721716	938.836
58.6632	674		0.00541091	939.169
58.6935	674		0.00360637	939.46
58.7237	674		0.00450767	938.669
58.754	675		0.00450735	936.96
58.7843	675		0.00180144	935.309
58.8145	676		0.00540161	934.516
58.8448	676		0.0188992	933.892
58.8751	676		0.0431534	933.23
58.9053	677		0.0593216	931.881
58.9356	677		0.0790812	930.145
58.9659	677		0.114063	928.299
58.9962	678		0.138288	926.193
59.0264	678		0.155314	924.117
59.0567	679		0.169592	923.054
59.087	679		0.175897	922.137
59.1172	679		0.16423	921.599
59.1475	680		0.126574	921.136
59.1778	680		0.03142	920.632
59.208	680		0.0242324	919.085
59.2383	681		0.0260237	917
59.2686	681		0.0152559	914.938
59.2989	682		0.00717972	913.372
59.3291	682		0.00448551	912.305
59.3594	682		0.00269085	911.219
59.3897	683		0.00628022	910.034
59.4199	683		0.0152491	909.336
59.4502	683		0.00896925	909.149
59.4805	684		0.00628056	909.436
59.5107	684		0.00807399	910.072
59.541	684		0.0080724	910.497
59.5713	685		0.0107619	909.846
59.6016	685		0.00806972	909.159
59.6318	686		0.00717489	908.477
59.6621	686		0.00358786	907.824
59.6924	686		0.00269097	907.145
59.7226	687		0.00538121	906.461
59.7529	687		0.0125576	906.371
59.7832	687		0.00807559	906.669
59.8134	688		0.00897336	906.828
59.8437	688		0.0161474	906.83
59.874	688		0.0260202	906.557
59.9043	689		0.0278274	906.106
59.9345	689		0.0242348	905.517
59.9648	690		0.0152561	904.744
59.9951	690		0.00538281	904.81
60.0253	690		0.0107673	905.24
60.0556	691		0.0385809	904.704
60.0859	691		0.0421653	904.212
60.1161	692		0.0170449	904.525
60.1464	692		0.0107618	904.689
60.1767	692		0.00358629	904.778
60.207	693		0	904.903
60.2372	693		0	904.46
60.2675	693		0	903.825
60.2978	694		0.00358735	903.861
60.328	694		0.00448374	904.454
60.3583	695		0	904.863
60.3886	695		0	904.464
60.4188	695		0	904.065
60.4491	696		0.000895624	903.449
60.4794	696		0.00447864	903.292
60.5096	696		0.00806177	903.235
60.5399	697		0.0017915	903.366
60.5702	697		0.00358298	903.332
60.6005	698		0.00627302	902.769
60.6307	698		0.00716839	902.259
60.661	698		0	901.688
60.6913	699		0.000896531	901.359
[truncated: 33,263 more rows]

## Sheet: Table S3 XRF Data
Table S3: X-ray fluorescence (XRF) core scanning results shown in Fig. 2 and 4
Depth (cm)	Years (BP)	Niobium (cts/tcts)
1	82	0.0096819
2	90	0.00709385
3	98	0.00731592
4	107	0.00712145
5	115	0.00831695
6	123	0.00906752
7	131	0.00844345
8	139	0.00860736
9	148	0.00740185
10	156	0.00874335
11	164	0.00679135
12	173	0.0056404
13	181	0.00710443
14	189	0.00807637
15	198	0.00799832
16	206	0.0101657
17	215	0.00892127
18	223	0.00836707
19	232	0.00502685
20	240	0.00857017
21	248	0.00704839
22	257	0.0066081
23	266	0.00757052
25	284	0.00860221
26	293	0.00592764
27	301	0.00576665
28	310	0.00616628
29	319	0.0084145
30	328	0.00495595
31	337	0.00785402
32	348	0.00825005
33	360	0.00707386
34	372	0.00831124
35	383	0.00738683
36	395	0.00740965
37	406	0.00793862
38	418	0.0104867
39	430	0.00788291
40	441	0.0079293
41	453	0.00639994
42	464	0.00848331
43	476	0.00693551
44	487	0.00705873
45	498	0.0108151
46	510	0.00993681
47	521	0.00808846
48	533	0.00964812
49	544	0.0082487
50	555	0.00832044
51	567	0.00903787
52	579	0.0105215
53	591	0.0101471
54	604	0.0112543
55	616	0.00681786
56	628	0.00806196
57	641	0.00775746
58	653	0.01043
59	666	0.010469
60	678	0.00931072
61	690	0.00841639
62	703	0.00836958
63	716	0.00974059
64	730	0.01336
65	743	0.011203
66	756	0.00835762
67	769	0.0112489
68	782	0.0106837
69	795	0.0104147
70	808	0.0109172
71	821	0.0114689
72	834	0.00816347
73	848	0.012962
74	861	0.0120844
75	874	0.012659
76	887	0.0137356
77	900	0.0101854
78	913	0.0120695
79	926	0.0100783
80	939	0.00883569
81	952	0.0127817
82	966	0.0108316
83	980	0.0113885
84	994	0.0118019
85	1007	0.011254
86	1021	0.0135803
87	1035	0.0104502
88	1049	0.0116071
89	1063	0.0111924
90	1077	0.0128142
91	1090	0.010849
92	1104	0.0136441
93	1119	0.0123284
94	1133	0.0107642
95	1147	0.0128892
96	1161	0.0113633
97	1175	0.0113284
98	1189	0.0112019
99	1203	0.00773844
100	1217	0.0115611
101	1231	0.0108383
102	1245	0.0123192
103	1258	0.0121024
104	1272	0.0109453
105	1286	0.009732
106	1299	0.00868158
107	1313	0.00878582
108	1327	0.00997531
109	1341	0.00969798
110	1354	0.0103787
111	1368	0.0101782
112	1381	0.0114807
113	1395	0.0106719
114	1408	0.0110032
115	1421	0.01289
116	1435	0.011726
117	1448	0.0127865
118	1461	0.0107253
119	1474	0.011712
120	1488	0.010479
121	1501	0.0136321
122	1515	0.0112323
123	1529	0.00985782
124	1544	0.011993
125	1558	0.0127592
126	1572	0.0102075
127	1586	0.00990591
128	1601	0.0121067
129	1615	0.0134204
130	1629	0.0106767
131	1643	0.0124013
132	1657	0.0103306
133	1671	0.0139352
134	1685	0.0109747
135	1699	0.00881253
136	1713	0.0103577
137	1726	0.0102899
138	1740	0.0112487
139	1754	0.00953525
140	1768	0.00809349
141	1782	0.0110132
142	1795	0.0112756
143	1809	0.00896162
144	1822	0.0104626
145	1836	0.00982649
146	1849	0.00732818
147	1863	0.010737
148	1876	0.0105439
149	1890	0.00962147
150	1903	0.00704188
151	1916	0.011713
152	1930	0.0124679
153	1944	0.0224392
154	1957	0.0091718
155	1971	0.00763657
156	1984	0.0097719
157	1998	0.00856086
158	2012	0.00917862
159	2025	0.010951
160	2039	0.00774099
161	2052	0.0081736
162	2066	0.00894274
163	2079	0.00648737
164	2093	0.00892021
165	2106	0.0106122
166	2120	0.0066816
167	2133	0.0126938
168	2147	0.00947514
169	2160	0.00924231
170	2174	0.0110214
171	2187	0.00747809
172	2200	0.0079223
173	2212	0.0117347
174	2225	0.0104076
175	2237	0.00892444
176	2249	0.00695157
177	2262	0.00863897
178	2274	0.00980556
179	2287	0.0114215
180	2299	0.00822081
181	2312	0.00898215
182	2324	0.0104921
183	2336	0.0102811
184	2348	0.00598919
185	2360	0.00881605
186	2372	0.00802072
187	2384	0.00844342
188	2396	0.00657412
189	2408	0.00756505
190	2420	0.00725098
191	2432	0.00846626
192	2445	0.0102041
193	2457	0.00775854
194	2469	0.00795034
195	2481	0.00784967
196	2493	0.0105154
197	2505	0.00378176
198	2518	0.00779792
199	2530	0.00807307
200	2542	0.00764681
201	2554	0.00858455
202	2566	0.00811067
203	2578	0.00540412
204	2591	0.00680754
205	2603	0.00787937
206	2615	0.00818354
207	2627	0.00723688
208	2639	0.00688888
211	2676	0.00999004
212	2688	0.0104655
213	2700	0.00921961
214	2712	0.00830627
215	2724	0.00827027
216	2735	0.00794321
217	2747	0.0102105
218	2759	0.00748509
219	2771	0.00992327
220	2783	0.0108909
221	2795	0.010585
222	2807	0.0112124
223	2819	0.00811341
225	2843	0.00868549
226	2855	0.0132063
227	2867	0.00760137
228	2879	0.0106084
229	2891	0.0130636
230	2903	0.00929864
231	2915	0.0115809
232	2928	0.0132768
233	2940	0.0122567
234	2953	0.0124686
235	2965	0.010996
236	2978	0.0107283
237	2991	0.00826236
238	3003	0.0105843
239	3016	0.00774037
240	3028	0.01152
241	3041	0.00846188
242	3053	0.0109965
243	3065	0.01049
244	3077	0.0103963
245	3088	0.0115434
246	3100	0.0112774
247	3112	0.0102965
248	3124	0.00772247
249	3136	0.00869612
250	3148	0.00650892
251	3159	0.00860146
252	3171	0.00849037
253	3183	0.0105054
254	3195	0.0071687
255	3207	0.0096496
256	3219	0.0116357
257	3231	0.00886871
258	3242	0.0131221
259	3254	0.0122578
260	3266	0.00893556
261	3278	0.00808803
262	3290	0.0113506
263	3302	0.0119513
264	3313	0.00829077
265	3325	0.00684047
266	3337	0.00819021
267	3348	0.00736461
268	3360	0.00763869
269	3372	0.0096371
270	3384	0.00805446
271	3395	0.00598841
272	3408	0.0115242
273	3420	0.00690458
274	3432	0.00819737
275	3444	0.00895891
276	3456	0.00767843
277	3469	0.00729178
278	3481	0.00538913
279	3493	0.00949128
280	3505	0.00727666
281	3517	0.00924704
282	3529	0.00900262
283	3541	0.0073196
284	3553	0.00902088
285	3564	0.0083645
286	3576	0.00669365
287	3588	0.00790118
288	3600	0.00664073
289	3612	0.0115458
290	3623	0.00848292
291	3635	0.00977233
292	3647	0.0102538
293	3659	0.00799396
294	3670	0.0108119
295	3682	0.0119302
296	3694	0.00897939
297	3706	0.00846491
298	3717	0.00916599
299	3729	0.00775214
300	3741	0.0115018
301	3752	0.0101641
302	3762	0.00900179
303	3771	0.010181
304	3780	0.00751958
305	3789	0.00894297
306	3798	0.0069371
307	3808	0.00886174
308	3817	0.00691086
309	3826	0.00862653
310	3835	0.00598577
311	3844	0.00475621
312	3854	0.00868384
313	3863	0.00755275
314	3873	0.00822394
315	3882	0.00925787
316	3892	0.0065516
317	3901	0.00471651
318	3910	0.00930401
319	3920	0.00914347
320	3929	0.00692653
321	3939	0.00884179
322	3948	0.00715245
323	3957	0.00812965
325	3975	0.00813783
326	3984	0.0064152
327	3993	0.0090955
328	4002	0.00634997
329	4011	0.0075865
330	4020	0.00581454
331	4029	0.0051366
332	4038	0.00614728
333	4048	0.00556288
334	4057	0.00686344
335	4066	0.00905462
336	4076	0.00730019
337	4085	0.00698899
338	4094	0.007265
339	4104	0.00869733
340	4113	0.00860087
345	4162	0.00475
346	4171	0.00747868
347	4181	0.0078368
348	4191	0.00733757
349	4201	0.00732802
350	4211	0.00886649
351	4220	0.00365197
352	4231	0.00875327
353	4242	0.00758922
354	4253	0.0083969
355	4264	0.00764389
356	4275	0.00930263
357	4286	0.00695354
358	4297	0.00991331
359	4308	0.00852983
360	4319	0.00828787
361	4329	0.00732991
362	4341	0.00741626
363	4352	0.00775416
364	4363	0.00984358
365	4374	0.00672766
366	4385	0.00572636
367	4396	0.00820392
368	4407	0.0119733
369	4418	0.00850855
370	4430	0.00787351
371	4441	0.0054363
372	4452	0.00662887
373	4463	0.00633362
374	4474	0.00627694
375	4486	0.00611198
376	4497	0.00641184
377	4508	0.00748918
378	4519	0.00646851
379	4531	0.0101976
380	4542	0.00505652
381	4553	0.00654026
382	4565	0.00749747
383	4576	0.00802979
384	4588	0.011119
385	4599	0.00769549
386	4611	0.00940832
387	4622	0.0104189
388	4634	0.00777601
389	4645	0.00817377
390	4657	0.0103017
391	4669	0.0101226
392	4680	0.00771282
393	4691	0.0103911
394	4702	0.0084239
395	4713	0.008899
396	4724	0.0100778
397	4735	0.00738074
398	4746	0.00970027
399	4757	0.00824222
400	4768	0.00890414
401	4779	0.00740174
402	4792	0.00712785
403	4806	0.00873936
404	4819	0.00420617
405	4833	0.0100806
406	4847	0.00734835
407	4860	0.00965997
408	4874	0.00514046
409	4888	0.00782676
410	4901	0.00660087
411	4915	0.00673233
412	4931	0.00858721
413	4948	0.0068764
414	4964	0.00847332
415	4981	0.00735168
416	4997	0.00691978
417	5013	0.00817329
418	5030	0.00731947
419	5046	0.00797423
420	5062	0.00743454
421	5079	0.0108623
422	5096	0.00587171
423	5113	0.00724638
425	5148	0.00776643
426	5165	0.0067158
427	5183	0.00799166
428	5200	0.00968648
429	5217	0.007674
430	5235	0.00672081
431	5252	0.00667259
432	5269	0.00734791
433	5287	0.00807947
434	5304	0.00790878
435	5322	0.0081078
436	5339	0.00784388
437	5357	0.00645882
438	5374	0.00760451
439	5392	0.00857075
440	5409	0.00565086
441	5426	0.00675071
442	5444	0.00923054
443	5462	0.00834675
444	5480	0.00801591
445	5497	0.00811644
446	5515	0.00876507
447	5533	0.00872224
448	5550	0.00552514
449	5568	0.00827741
450	5586	0.00731002
451	5604	0.00898805
452	5620	0.00649483
453	5636	0.00458909
454	5653	0.00554186
455	5669	0.0100143
456	5686	0.00795962
457	5702	0.00564226
458	5719	0.00828566
459	5735	0.00693072
460	5752	0.00556181
461	5768	0.00634526
462	5785	0.0037362
463	5802	0.00531193
464	5819	0.00687624
465	5836	0.00629526
466	5852	0.00795096
467	5869	0.00687294
468	5886	0.00792642
469	5903	0.00495493
470	5920	0.00696406
471	5937	0.00484376
472	5954	0.00639454
473	5970	0.00954481
474	5987	0.00657485
475	6004	0.00692948
476	6021	0.00652798
477	6038	0.00706677
478	6055	0.00793853
479	6071	0.00633842
480	6088	0.00590362
481	6105	0.0082318
482	6122	0.00939217
483	6139	0.0067316
484	6156	0.0117257
485	6174	0.00568611
486	6191	0.00720852
487	6208	0.00696698
488	6225	0.00753123
489	6242	0.00850892
490	6259	0.00760569
491	6277	0.0077841
492	6299	0.00804455
493	6322	0.00901065
494	6344	0.00581999
495	6367	0.00611271
496	6390	0.00863571
497	6412	0.00489502
498	6435	0.00529853
499	6458	0.00824816
500	6480	0.00631044
501	6503	0.00555163
502	6519	0.00629731
503	6536	0.00687852
504	6552	0.00675502
505	6568	0.00694284
506	6585	0.00678573
507	6601	0.00900901
508	6617	0.00831697
509	6634	0.007958
510	6650	0.00690097
511	6667	0.00899806
512	6682	0.0111194
513	6698	0.00727465
514	6714	0.00941651
515	6730	0.00928173
516	6746	0.00841585
517	6761	0.00886131
518	6777	0.00648062
519	6793	0.00749592
520	6809	0.00930371
521	6825	0.00621506
522	6841	0.00892741
523	6858	0.00524435
524	6874	0.00527758
528	6939	0.00707962
529	6956	0.0076324
530	6972	0.00896273
531	6988	0.00886935
532	7004	0.00770683
533	7020	0.00913401
534	7035	0.0118272
535	7051	0.00816586
536	7066	0.00804795
537	7082	0.0063594
538	7097	0.00671001
539	7113	0.00804373
540	7129	0.0105407
541	7144	0.00747465
543	7176	0.00722785
544	7191	0.00853395
545	7207	0.00797558
546	7223	0.0079304
547	7239	0.00900279
548	7254	0.00869959
549	7270	0.00954605
550	7286	0.00799257
551	7302	0.00699265
552	7317	0.00823003
553	7333	0.00742408
554	7348	0.00944083
555	7364	0.00705813
556	7379	0.00675232
557	7395	0.00705169
558	7410	0.00674296
559	7426	0.0106232
560	7441	0.00427026
561	7457	0.00897781
562	7472	0.00537967
563	7488	0.0070811
564	7504	0.00542816
565	7520	0.00940754
566	7536	0.00736683
567	7552	0.00725118
568	7568	0.00721414
569	7583	0.00752906
570	7599	0.00735341
571	7615	0.00757692
572	7630	0.00888593
573	7646	0.00800851
574	7661	0.00697859
575	7677	0.00631745
576	7692	0.00495925
577	7708	0.0107192
578	7723	0.00908394
579	7738	0.0079596
580	7754	0.00921341
581	7769	0.00640723
582	7784	0.00710652
583	7799	0.0116902
584	7814	0.00878006
585	7830	0.00946647
586	7845	0.00814236
587	7860	0.0082434
588	7875	0.00675513
589	7890	0.00936598
590	7905	0.00948669
591	7920	0.00926821
592	7932	0.00798367
593	7944	0.00641845
594	7956	0.00887918
595	7969	0.00885627
596	7981	0.0102956
597	7993	0.00894088
598	8005	0.00882384
599	8018	0.0112354
600	8030	0.0109838
601	8042	0.00932212
602	8055	0.0110934
603	8067	0.00896814
604	8080	0.00830314
605	8093	0.0104277
606	8105	0.0116083
607	8118	0.00977241
608	8131	0.00962206
609	8144	0.00993088
610	8156	0.0123626
611	8169	0.00750597
612	8181	0.00997991
613	8193	0.0103984
614	8205	0.00803054
615	8217	0.011032
616	8229	0.0115382
617	8241	0.00799063
618	8254	0.00869165
619	8266	0.00882707
620	8278	0.00862137
621	8290	0.011944
622	8302	0.00938547
623	8314	0.00693995
624	8326	0.00831934
625	8338	0.00972496
626	8350	0.00958736
628	8375	0.00861004
629	8387	0.0108388
630	8399	0.0122725
631	8411	0.00891105
632	8424	0.00755725
633	8436	0.00921908
634	8449	0.0105719
635	8462	0.0105519
636	8475	0.0111936
637	8487	0.00985891
638	8500	0.00985598
639	8513	0.0102161
640	8525	0.0105466
641	8538	0.0128216
642	8551	0.00936551
643	8563	0.00837212
644	8575	0.0106342
645	8587	0.0100493
652	8673	0.00905969
653	8684	0.0123813
654	8696	0.0112387
655	8708	0.0131845
656	8719	0.0109664
657	8731	0.0104614
658	8742	0.0100384
659	8754	0.0122436
660	8766	0.0114059
661	8777	0.0125288
662	8788	0.0120862
663	8800	0.0111438
664	8811	0.0100464
665	8822	0.0112789
666	8833	0.013047
667	8845	0.0110974
668	8856	0.00896897
669	8867	0.0109468
670	8878	0.0119186
671	8890	0.0118961
672	8901	0.00900259
673	8912	0.0105397
674	8923	0.0114403
675	8934	0.0121119
676	8945	0.0108768
677	8957	0.0105091
678	8968	0.00999161
679	8979	0.0120707
680	8990	0.0125062
681	9001	0.0132675
682	9013	0.0103151
683	9024	0.0139739
684	9035	0.0140171
685	9046	0.0118931
686	9057	0.0108672
687	9068	0.0110397
688	9080	0.0129449
689	9091	0.0112828
690	9102	0.0133302
691	9113	0.0120293
692	9124	0.0128733
693	9136	0.0151231
694	9147	0.0121086
695	9158	0.0104636
696	9169	0.0117647
697	9180	0.00984768
698	9192	0.0127252
699	9203	0.0134557
700	9214	0.0127693
701	9225	0.0117343
702	9237	0.0130678
703	9248	0.0123729
704	9259	0.0127785
705	9270	0.01055
706	9281	0.0111181
707	9293	0.0112607
708	9304	0.0135117
709	9315	0.0098589
710	9326	0.0142213
711	9338	0.0141011
714	9371	0.0103702
715	9382	0.0121463
716	9393	0.010747
717	9404	0.0124486
718	9415	0.0115747
719	9426	0.0114791
720	9438	0.0163433
728	9528	0.0139084
729	9540	0.0134423
730	9551	0.0138498
731	9563	0.015696
732	9574	0.0162745
733	9585	0.0158732
734	9597	0.0122136
735	9608	0.0173
736	9619	0.0157189
737	9630	0.0144083
738	9642	0.0125586
739	9653	0.0159236
740	9664	0.0167423
741	9676	0.0180645
742	9687	0.0150538
743	9698	0.0143565
744	9709	0.0144179
745	9720	0.0145582
746	9731	0.0154958
747	9742	0.0143513
748	9753	0.0174857
749	9764	0.015872
750	9775	0.0175589
751	9786	0.0161655
752	9796	0.0202758
753	9796	0.022244
754	9796	0.0211723
755	9796	0.0249527
756	9796	0.022888
757	9796	0.0216608
758	9796	0.0232729
759	9796	0.0236787
760	9796	0.0207581
761	9796	0.0221743
762	9796	0.0210249
763	9796	0.0206265
764	9796	0.0201365
765	9796	0.0202185
766	9796	0.0242667
767	9796	0.0217567
768	9796	0.0218272
769	9796	0.023977
770	9796	0.0218472
771	9796	0.0221599
772	9796	0.0228091
773	9796	0.0198705
774	9796	0.0227214
775	9796	0.0221727
776	9796	0.0231872
777	9796	0.0224935
778	9796	0.022148
779	9796	0.0208212
780	9796	0.0258242
781	9796	0.0225856
782	9796	0.022179
783	9796	0.0237168
784	9796	0.0218511
785	9796	0.0215257
786	9796	0.0216587
787	9796	0.0209769
788	9796	0.0240149
789	9796	0.0223526
790	9796	0.0231924
791	9796	0.0206648
792	9796	0.0214941
793	9796	0.0248981
794	9796	0.0221028
795	9796	0.0230038
796	9796	0.0207914
797	9796	0.021469
798	9796	0.0208679
799	9796	0.0225514
800	9796	0.0220114
801	9796	0.0220117
802	9796	0.0228242
803	9796	0.0232311
804	9796	0.0225301
805	9796	0.0217815
806	9796	0.0205337
807	9796	0.0199815
808	9796	0.0196414
809	9796	0.0219475
810	9796	0.0219216
811	9796	0.0227895
812	9796	0.021566
813	9796	0.0224843
814	9796	0.0208069
815	9796	0.021004
816	9796	0.0220237
817	9796	0.0240364
818	9796	0.0207187
819	9796	0.0205261
820	9796	0.0216092
821	9796	0.0224727
822	9796	0.0213137
823	9796	0.020954
824	9796	0.0212538
825	9796	0.022366
826	9796	0.0224072
828	9796	0.0190633
829	9796	0.0203478
830	9796	0.0209841
831	9796	0.0233981
832	9796	0.0247525
833	9796	0.0286289
834	9796	0.0231099
835	9796	0.0212001
836	9796	0.0184618
837	9796	0.0191464
838	9796	0.0196777
839	9796	0.0171591
840	9796	0.0202914
841	9796	0.017298
842	9796	0.019346
843	9796	0.0169839
844	9807	0.0181214
845	9817	0.0176293
846	9827	0.0168147
847	9838	0.0197055
848	9848	0.0169983
849	9859	0.0187685
850	9869	0.0196631
851	9880	0.0177682
852	9890	0.0177681
853	9900	0.0163128
854	9910	0.0166399
855	9920	0.0194422
856	9930	0.0152178
857	9940	0.0135177
858	9950	0.0173051
859	9960	0.0131251
860	9970	0.0168822
861	9980	0.0167006
862	9991	0.0171877
863	10000	0.0155034
864	10010	0.0183832
865	10020	0.0160719
866	10030	0.0160429
867	10040	0.0175048
868	10049	0.0199099
869	10059	0.0175274
870	10069	0.0161928
871	10079	0.0179864
872	10089	0.0160643
873	10099	0.0173095
874	10109	0.0187973
875	10119	0.0188912
876	10129	0.0164789
877	10140	0.0170262
878	10150	0.0154481
879	10160	0.0157968
880	10170	0.0137142
881	10181	0.0162005
882	10191	0.0188473
883	10201	0.019607
884	10211	0.0205201
885	10221	0.0169565
886	10231	0.0168418
887	10241	0.0148235
888	10252	0.0208271
889	10262	0.0198949
890	10272	0.0178506
891	10282	0.0185389
892	10292	0.0213433
893	10302	0.0206119
894	10312	0.0177346
895	10322	0.0243007
896	10332	0.0188951
897	10342	0.0233738
898	10352	0.0200797
899	10362	0.0196877
900	10372	0.0192955
901	10382	0.0218493
902	10392	0.0188053
903	10400	0.0191708
904	10409	0.0202287
905	10417	0.0200095
906	10426	0.0210075
907	10434	0.018906
908	10442	0.022809
909	10451	0.0192889
910	10459	0.014821
911	10468	0.0185776
912	10476	0.0196416
913	10485	0.0194929
914	10494	0.018835
915	10503	0.0141106
916	10511	0.0183031
917	10520	0.0188477
918	10529	0.0191739
919	10538	0.0165527
920	10547	0.0154949
921	10555	0.019113
922	10564	0.0205348
923	10573	0.01926
924	10581	0.0177892
925	10589	0.0180251
926	10598	0.0149639
927	10606	0.0149384
930	10631	0.015387
931	10639	0.0178688
932	10648	0.0158614
933	10656	0.0228466
934	10665	0.0173243
935	10673	0.0172974
936	10682	0.0153496
937	10690	0.0122347
938	10699	0.0135017
939	10707	0.0198079
940	10715	0.019321
941	10724	0.0220285
942	10732	0.0202351
943	10741	0.0185519
944	10749	0.0178316
945	10757	0.019039
946	10766	0.0199469
947	10774	0.0182683
948	10782	0.0171179
949	10791	0.0158693
950	10799	0.0171606
951	10807	0.0135244
952	10816	0.0170257
953	10824	0.0163662
954	10832	0.0147313
955	10840	0.0117102
956	10848	0.0111759
957	10856	0.0160399
958	10864	0.0165408
959	10872	0.0164182
960	10880	0.012961
961	10888	0.0158621
962	10896	0.0118605
963	10904	0.015651
964	10913	0.0158224
965	10921	0.0172089
966	10929	0.0182448
967	10937	0.0204053
968	10945	0.0190279
969	10954	0.0193903
970	10962	0.0203632
971	10970	0.0179734
972	10978	0.0174571
973	10986	0.0201252
974	10995	0.0219022
975	11003	0.0243103
976	11011	0.0199142
977	11019	0.0181524
978	11027	0.0190732
979	11036	0.0187867
980	11044	0.024042
981	11052	0.0180859
982	11060	0.0194199
985	11085	0.0150134
986	11093	0.0188909
987	11102	0.0152487
988	11110	0.0150223
989	11118	0.0156962
990	11126	0.0200101
991	11135	0.0230763
992	11143	0.0228453
993	11151	0.0194393
994	11159	0.0168619
995	11168	0.0219665
996	11176	0.0235312
997	11184	0.0211416
998	11192	0.0180385
999	11200	0.0224382
1000	11208	0.0232602
1001	11217	0.024731
1002	11225	0.0239527
1003	11233	0.0244463
1004	11241	0.0176691
1005	11250	0.013801
1006	11258	0.0144099
1007	11266	0.0188165
1008	11275	0.0188374
1009	11283	0.019717
1010	11291	0.0220513
1011	11300	0.024752
1012	11308	0.0238134
1013	11318	0.0266435
1014	11328	0.021633
1015	11339	0.0183919
1016	11349	0.021203
1017	11359	0.0214641
1018	11369	0.0234844
1019	11380	0.0243526
1020	11390	0.0212443
1021	11400	0.0243104
1022	11411	0.0240283
1023	11421	0.0212071
1024	11431	0.0222917
1025	11441	0.0215416
1026	11451	0.0216272
1027	11461	0.0248568
1028	11471	0.0223338
1029	11481	0.0209113
1030	11491	0.0231459
1031	11501	0.0233352
1032	11511	0.0225517
1033	11521	0.0235619
1034	11531	0.022288
1035	11541	0.0217936
1036	11551	0.0251977
1037	11561	0.0283404
1038	11571	0.0245443
1039	11581	0.0232494
1040	11591	0.0221708
1041	11601	0.0239528
1042	11611	0.0206594
1043	11621	0.0218807
1044	11631	0.0229508
1045	11641	0.021428
1046	11652	0.0201302
1047	11662	0.0191229
1048	11672	0.0200863
1049	11682	0.0211819
1050	11692	0.0217322
1051	11702	0.0228818
1052	11712	0.0236169
1053	11723	0.0211633
1054	11733	0.0268911
1055	11743	0.0239493
1056	11753	0.021494
1057	11764	0.0238187
1058	11774	0.0258699
1059	11784	0.0237172
1060	11794	0.0208155
1061	11805	0.0265154
1062	11815	0.0264844
